# Supplementary material
Source: publisher figshare collection journal article supplement (https://acs.figshare.com/ndownloader/files/12454367)

# Scalable Synthesis of Cyclocitrinol

Yu Wang, Wei Ju, Hailong Tian, Weisheng Tian and Jinghan Gui\*

CAS Key Laboratory of Synthetic Chemistry of Natural Substances, Center for Excellence in Molecular Synthesis,  
Shanghai Institute of Organic Chemistry, University of Chinese Academy of Sciences,  
Chinese Academy of Sciences, 345 Lingling Road, Shanghai 200032, China

\*Correspondence to: guijh@sioc.ac.cn.

## Supporting Information

### Table of Contents

|                                                                                       |     |
|---------------------------------------------------------------------------------------|-----|
| 1. General experimental .....                                                         | S2  |
| 2. Optimization of the key biomimetic cascade rearrangement.....                      | S3  |
| 3. Experimental procedures and characterization data for compounds <b>10-20</b> ..... | S4  |
| 4. NMR comparison of synthetic and natural cyclocitrinol .....                        | S14 |
| 5. X-ray crystallographic data for <b>18</b> .....                                    | S18 |
| 6. References.....                                                                    | S20 |
| 7. NMR spectra .....                                                                  | S21 |

## 1. General experimental

All reactions utilizing air- or moisture-sensitive reagents were carried out in flame-dried glassware under an argon atmosphere, unless otherwise stated. Dry tetrahydrofuran (THF), dichloromethane (DCM), toluene (PhMe), diethyl ether (Et<sub>2</sub>O) were obtained by passing the HPLC grade or pre-dried solvents through activated alumina columns. Reagents were purchased at the highest commercial quality and used without further purification, unless otherwise stated. Reactions were magnetically stirred and monitored by thin layer chromatography (TLC) with 0.15-0.2 mm pre-coated silica gel (10-40  $\mu$ m) plates, using UV light as the visualizing agent or ethanolic phosphomolybdic acid and heating as developing agents. Flash chromatography was performed with silica gel (200-300 mesh) under pressure. Yields refer to chromatographically and spectroscopically (<sup>1</sup>H NMR) homogeneous material, unless otherwise stated. NMR spectra were recorded on Bruker-400 spectrometers and were calibrated using residual undeuterated solvent as an internal reference (CDCl<sub>3</sub> <sup>1</sup>H NMR  $\delta$  = 7.26 ppm, <sup>13</sup>C NMR  $\delta$  = 77.2 ppm; DMSO-*d*<sub>6</sub> <sup>1</sup>H NMR  $\delta$  = 2.50 ppm, <sup>13</sup>C NMR  $\delta$  = 39.5 ppm). The following abbreviations were used to explain multiplicities: s = singlet, d = doublet, t = triplet, q = quartet, m = multiplet, br = broad. IR spectra were collected on Avatar 330 FT-IR spectrometer. Melting points were determined on SGW X-4 microscopic melting point apparatus and were uncorrected. Optical rotations were determined on JASCO P-1030 Polarimeter in the solvent indicated. High-resolution mass spectra were recorded on IonSpec 4.7 Tesla FTMS or Bruker Daltonics, Inc. APEXIII 7.0 TESLA FTMS.

## 2. Optimization of the key biomimetic cascade rearrangement.

**Table S1. Optimization of the key biomimetic cascade rearrangement.**

| entry                 | base (2 equiv)                 | solvent          | temp. (°C) | concentration (mol/L) | time (h)   | <sup>1</sup> H NMR ratio (20:17:16) <sup>a</sup> |
|-----------------------|--------------------------------|------------------|------------|-----------------------|------------|--------------------------------------------------|
| 1                     | -                              | toluene          | 70         | 0.02                  | 5          | <b>16</b> only                                   |
| 2                     | Et <sub>3</sub> N              | toluene          | 70         | 0.02                  | 12         | 81:15:4                                          |
| 3                     | DIPEA                          | toluene          | 70         | 0.02                  | 12         | 73:19:8                                          |
| 4                     | Proton sponge                  | toluene          | 70         | 0.02                  | 12         | 75:18:7                                          |
| 5                     | HMTA                           | toluene          | 70         | 0.02                  | 12         | 76:18:6                                          |
| 6                     | Pyridine                       | toluene          | 70         | 0.02                  | 12         | 33:19:48                                         |
| 7                     | DABCO                          | toluene          | 70         | 0.02                  | 12         | 77:18:5                                          |
| 8                     | DABCO                          | toluene          | 100        | 0.02                  | 5.5        | 0:67:33                                          |
| 9                     | DABCO                          | MeCN             | 100        | 0.02                  | 2.5        | 0:17:83                                          |
| 10                    | DABCO                          | DMF              | 100        | 0.02                  | 1.5        | complex                                          |
| 11                    | DABCO                          | chlorobenzene    | 120        | 0.02                  | 1.5        | 0:71:29                                          |
| 12                    | DABCO                          | <i>o</i> -DCB    | 120        | 0.02                  | 1          | 0:67:33                                          |
| 13                    | DABCO                          | DCE              | 120        | 0.02                  | 5          | 0:23:77                                          |
| 14                    | DABCO                          | CCl <sub>4</sub> | 120        | 0.02                  | 6          | 0:47:53                                          |
| 15                    | DABCO                          | dioxane          | 120        | 0.02                  | 1          | 0:57:43                                          |
| 16                    | DABCO                          | anisole          | 120        | 0.02                  | 1          | 0:68:32                                          |
| <b>17</b>             | <b>DABCO</b>                   | <b>toluene</b>   | <b>130</b> | <b>0.02</b>           | <b>1.5</b> | <b>0:77:23</b>                                   |
| 18 <sup>b</sup>       | DABCO                          | toluene          | 130        | 0.03                  | 2          | 0:70:30                                          |
| 19 <sup>b</sup>       | DABCO                          | toluene          | 130        | 0.01                  | 2          | 0:80:20                                          |
| 20 <sup>b</sup>       | DABCO                          | toluene          | 130        | 0.005                 | 2          | 0:84:16                                          |
| 21 <sup>b</sup>       | DABCO                          | toluene          | 130        | 0.0025                | 2          | 0:86:14                                          |
| <b>22<sup>b</sup></b> | <b><i>O</i>-methylquinine</b>  | <b>toluene</b>   | <b>130</b> | <b>0.0025</b>         | <b>2</b>   | <b>0:89:11 (57%)<sup>c</sup></b>                 |
| 23 <sup>b</sup>       | <i>O</i> -methylquinidine      | toluene          | 130        | 0.0025                | 2          | 0:88:12                                          |
| 24 <sup>b</sup>       | <i>O</i> -methylhydroquinine   | toluene          | 130        | 0.0025                | 2          | 0:89:11                                          |
| 25 <sup>b</sup>       | <i>O</i> -methylhydroquinidine | toluene          | 130        | 0.0025                | 2          | 0:89:11                                          |
| 26 <sup>b</sup>       | <i>O</i> -methylcinchonidine   | toluene          | 130        | 0.0025                | 2          | 0:85:15                                          |

<sup>a</sup>determined by <sup>1</sup>H NMR of the crude reaction mixture. <sup>b</sup>**15** was used as crude mixture from *m*-CPBA oxidation.

<sup>c</sup>Isolated yield of **17** shown in parenthesis. DIPEA, diisopropylethylamine; proton sponge, 1,8-bis(dimethylamino)naphthalene; HMTA = hexamethylenetetramine; DABCO, 1,4-diazabicyclo[2.2.2]octane; DMF, *N,N*-dimethylformamide; DCB, 1,2-dichlorobenzene; DCE, 1,2-dichloroethane.

### 3. Experimental procedures and characterization data for compounds 10-20.

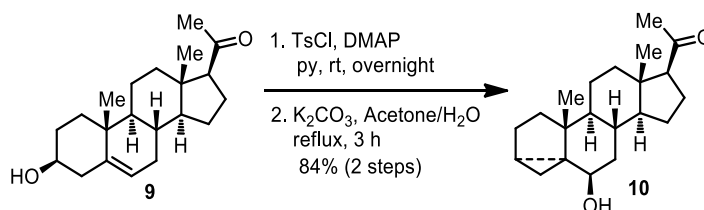

To a solution of pregnenolone **9** (10 g, 31.6 mmol, 1.0 equiv) in pyridine (80 mL) was added recrystallized TsCl (18.1 g, 94.9 mmol, 3.0 equiv) and DMAP (1.9 g, 15.8 mmol, 0.5 equiv). The reaction mixture was stirred at room temperature overnight and poured into ice water. The solid was filtered and the filtrate was washed with water and dried to give the crude tosylate, which was used in the next step without further purification.

A solution of the crude tosylate and K<sub>2</sub>CO<sub>3</sub> (13.1 g, 94.8 mmol, 3.0 equiv) in acetone/H<sub>2</sub>O (525 mL, 4:1) was refluxed for 3 h. Acetone was removed under reduced pressure and the crude product was extracted with DCM (3×100 mL). The combined organic layers were washed with brine (100 mL) and dried over Na<sub>2</sub>SO<sub>4</sub>. Concentration under reduced pressure afforded the crude product, which was purified by flash chromatography (SiO<sub>2</sub>, 5:1→3:1 petroleum ether:EtOAc) to provide compound **10** (8.4 g, 84%) as a white solid and recovered pregnenolone **9** (0.6 g, 6%).

The <sup>1</sup>H NMR of compound **10** was in accordance with that reported in the literature.<sup>1</sup>

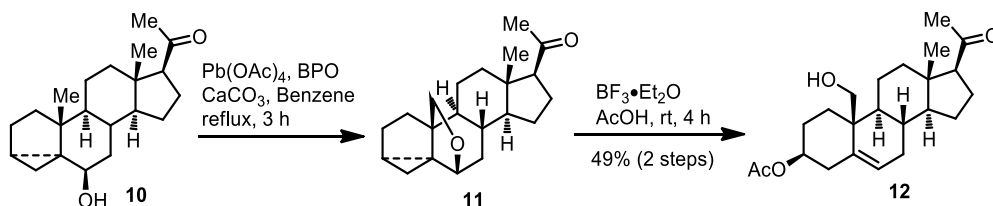

To a solution of **10** (4.0 g, 12.6 mmol, 1.0 equiv) and CaCO<sub>3</sub> (3.6 g, 31.5 mmol, 2.5 equiv) in dry benzene (640 mL) was added Pb(OAc)<sub>4</sub> (5.6 g, 12.6 mmol, 1.0 equiv) and BPO (610 mg, 2.52 mmol, 0.2 equiv). After the reaction mixture was refluxed for 1 h, Pb(OAc)<sub>4</sub> (5.6 g×2, 12.6 mmol×2, 1.0 equiv×2) and BPO (610 mg×2, 2.52 mmol×2, 0.2 equiv×2) were added in two portions every 1 h. After being refluxed for additional 2 h, the mixture was then filtered through celite and the

filtrate was washed with saturated aq. Na<sub>2</sub>SO<sub>3</sub>, aq. NaHCO<sub>3</sub> (5%), brine and dried over Na<sub>2</sub>SO<sub>4</sub>. Concentration under reduced pressure afforded the crude product, which was used in the next step without further purification.

To a solution of the crude product in 186 mL AcOH was added distilled BF<sub>3</sub>·Et<sub>2</sub>O (80  $\mu$ L, 1.26 mmol, 0.1 equiv). After stirred for 4 h at room temperature, the reaction mixture was poured into 80 mL H<sub>2</sub>O and extracted with DCM (3 $\times$ 100 mL). The combined organic layers were washed with brine, dried over Na<sub>2</sub>SO<sub>4</sub>, and concentrated *in vacuo*. The crude residue was purified by flash chromatography (SiO<sub>2</sub>, 5:1 $\rightarrow$ 3:1 petroleum ether:EtOAc) to provide compound **12** (2.3 g, 49%) as a white solid.

**Compound 11:** TLC (petroleum ether:EtOAc, 5:1 v/v):  $R_f$  = 0.35;  $[\alpha]_D^{29}$  +29.1 (*c* 0.45, CHCl<sub>3</sub>); <sup>1</sup>H NMR (400 MHz, CDCl<sub>3</sub>)  $\delta$  3.91 (d,  $J$  = 7.2 Hz, 1H), 3.89 (d,  $J$  = 4.8 Hz, 1H), 3.43 (d,  $J$  = 7.2 Hz, 1H), 2.52 (t,  $J$  = 9.0 Hz, 1H), 2.11 (s, 3H), 0.76 (dd,  $J$  = 4.5, 2.3 Hz, 1H), 0.69 (s, 3H), 0.30 (dd,  $J$  = 7.5, 4.5 Hz, 1H); <sup>13</sup>C NMR (101 MHz, CDCl<sub>3</sub>)  $\delta$  209.5, 76.5, 70.8, 63.7, 55.9, 55.2, 47.8, 47.0, 44.7, 39.3, 35.6, 34.5, 33.5, 31.4, 23.7, 23.5, 23.0, 20.6, 15.6, 13.8, 12.7; IR (KBr):  $\nu$  = 2930, 2849, 1704, 1459, 1385, 1188, 1050, 800 cm<sup>-1</sup>; HRMS (ESI,  $m/z$ ): [M+H]<sup>+</sup> calcd for C<sub>21</sub>H<sub>31</sub>O<sub>2</sub>, 315.2319; found, 315.2319.

The <sup>1</sup>H NMR of compound **12** was in accordance with that reported in the literature.<sup>2</sup>

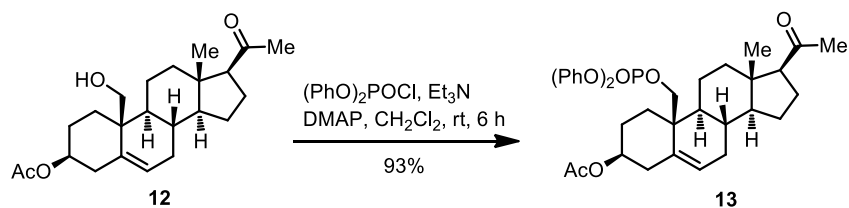

To a solution of **12** (6.9 g, 18.4 mmol, 1.0 equiv) in dry DCM (90 mL) was added successively Et<sub>3</sub>N (10.2 mL, 73.6 mmol, 4.0 equiv), (PhO)<sub>2</sub>POCl (7.6 mL, 36.7 mmol, 2.0 equiv) and DMAP (0.22 g, 1.84 mmol, 0.1 equiv) at room temperature. After stirred at this temperature for 6 h, the reaction mixture was quenched with sat. aq. NaHCO<sub>3</sub> (60 mL) and extracted with DCM (3 $\times$ 100 mL). The combined organic layers were washed with brine and dried over Na<sub>2</sub>SO<sub>4</sub>. Removal of the solvent under reduced pressure and purification by flash chromatography (SiO<sub>2</sub>, 5:1 petroleum

ether:EtOAc) furnished compound **13** as a white solid (10.6 g, 93%).

**Compound 13:** mp: 111.6 – 112.3 °C; TLC (petroleum ether:acetone, 4:1 v/v):  $R_f$  = 0.52;  $[\alpha]_D^{25}$  – 1.9 ( $c$  1.00, CHCl<sub>3</sub>); <sup>1</sup>H NMR (400 MHz, CDCl<sub>3</sub>)  $\delta$  7.36 – 7.26 (m, 4H), 7.24 – 7.16 (m, 6H), 5.59 (d,  $J$  = 4.9 Hz, 1H), 4.66 – 4.55 (m, 1H), 4.48 (dd,  $J$  = 10.7, 5.0 Hz, 1H), 4.19 (dd,  $J$  = 10.7, 4.1 Hz, 1H), 2.50 – 2.44 (m, 1H), 2.43 – 2.36 (m, 1H), 2.10 (s, 3H), 2.02 (s, 3H), 0.50 (s, 3H); <sup>13</sup>C NMR (101 MHz, CDCl<sub>3</sub>)  $\delta$  209.4, 170.5, 150.50 (d,  $J_{C-P}$  = 7.4 Hz), 150.48 (d,  $J_{C-P}$  = 7.4 Hz), 133.4, 129.8, 129.7, 127.4, 125.4, 125.3, 119.92 (d,  $J_{C-P}$  = 5.0 Hz), 119.91 (d,  $J_{C-P}$  = 5.0 Hz), 73.0, 68.4 (d,  $J_{C-P}$  = 7.1 Hz), 63.5, 57.3, 49.7, 43.9, 40.5 (d,  $J_{C-P}$  = 8.1 Hz), 38.9, 37.9, 32.5, 32.4, 31.5, 31.1, 27.6, 24.1, 22.7, 21.7, 21.3, 13.2; IR (KBr):  $\nu$  = 2938, 2854, 1730, 1700, 1590, 1491, 1447, 945 cm<sup>-1</sup>; HRMS (ESI,  $m/z$ ):  $[M+Na]^+$  calcd for C<sub>35</sub>H<sub>43</sub>O<sub>7</sub>NaP, 629.2639; found, 629.2631.

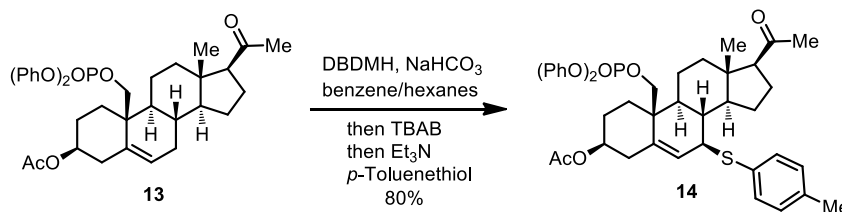

A flame-dried 250 mL three-necked flask equipped with a stir bar was charged with hexanes/benzene (120 mL, 1:1) and bubbled with Ar for 15 min before **13** (3 g, 4.95 mmol, 1.0 equiv), DBDMH (0.85 g, 3.0 mmol, 0.6 equiv) and NaHCO<sub>3</sub> (2 g, 24.7 mmol, 5.0 equiv) were added. After being refluxed at 80 °C for 1 h, the reaction mixture was cooled to room temperature and TBAB (0.1 M in THF, 10 mL, 1.0 mmol, 0.2 equiv) was added. After another 1 h at room temperature, Et<sub>3</sub>N (1.38 mL, 10.0 mmol, 2.0 equiv) and *p*-toluenethiol (1.23 g, 10.0 mmol, 2.0 equiv) were added. The reaction mixture was stirred at room temperature for 1 h and quenched with sat. aq. NaHCO<sub>3</sub> and extracted with EtOAc (100 mL). The aqueous phase was further extracted with EtOAc (3×100 mL). The combined organic layers were washed with brine, dried over Na<sub>2</sub>SO<sub>4</sub> and concentrated *in vacuo*. The residue was purified by flash chromatography (SiO<sub>2</sub>, 8:1→5:1 petroleum ether:EtOAc) to furnish compound **14** as a white solid (2.9 g, 80%).

**Compound 14:** mp: 123.9 – 125.4 °C; TLC (petroleum ether:EtOAc, 2:1 v/v):  $R_f$  = 0.59;  $[\alpha]_D^{25}$

+73.7 (*c* 0.80, CHCl<sub>3</sub>); <sup>1</sup>H NMR (400 MHz, CDCl<sub>3</sub>) δ 7.39 – 7.29 (m, 4H), 7.26 – 7.15 (m, 8H), 7.09 – 7.03 (m, 2H), 5.59 (br s, 1H), 4.61 – 4.51 (m, 1H), 3.81 (dd, *J* = 11.1, 4.4 Hz, 1H), 3.43 (dd, *J* = 11.1, 3.7 Hz, 1H), 3.22 (d, *J* = 8.3 Hz, 1H), 2.49 (t, *J* = 9.3 Hz, 1H), 2.46 – 2.38 (m, 1H), 2.27 (s, 3H), 2.11 (s, 3H), 2.01 (s, 3H), 0.60 (s, 3H); <sup>13</sup>C NMR (101 MHz, CDCl<sub>3</sub>) δ 209.5, 170.6, 150.6 (d, *J*<sub>C-P</sub> = 7.4 Hz), 150.5 (d, *J*<sub>C-P</sub> = 7.4 Hz), 138.6, 135.3, 135.2, 130.0, 129.92, 129.88, 129.6, 129.1, 125.54, 125.49, 120.13 (d, *J*<sub>C-P</sub> = 4.8 Hz), 120.08 (d, *J*<sub>C-P</sub> = 4.9 Hz), 72.4, 67.1 (d, *J*<sub>C-P</sub> = 7.1 Hz), 63.2, 57.4, 50.8, 49.3, 44.9, 40.9 (d, *J*<sub>C-P</sub> = 8.4 Hz), 39.3, 37.6, 36.9, 31.7, 30.8, 27.3, 26.9, 23.4, 22.6, 21.4, 21.2, 13.6; IR (KBr): ν = 2945, 2872, 1732, 1702, 1590, 1489, 1456, 952 cm<sup>-1</sup>; HRMS (ESI, *m/z*): [M+Na]<sup>+</sup> calcd for C<sub>42</sub>H<sub>49</sub>O<sub>7</sub>NaPS, 751.2829; found, 751.2823.

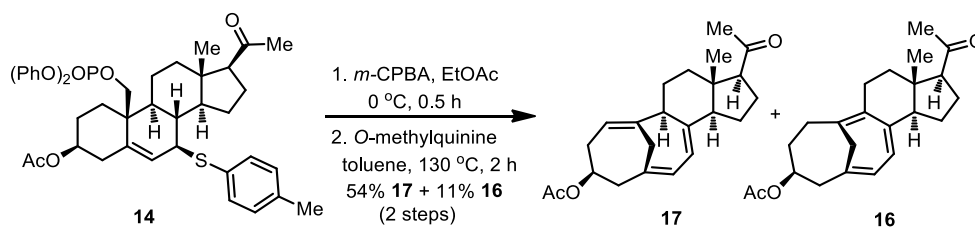

To a solution of **14** (1.0 g, 1.37 mmol, 1.0 equiv) in EtOAc (50 mL) was added 85% *m*-CPBA (0.3 g, 1.44 mmol, 1.05 equiv) at 0 °C. After stirred at this temperature for 0.5 h, the reaction mixture was quenched with sat. aq. Na<sub>2</sub>SO<sub>3</sub> and the aqueous phase was extracted with EtOAc (3×40 mL). The combined organic layers were washed with brine and dried over Na<sub>2</sub>SO<sub>4</sub>. Removal of the solvent under reduced pressure afforded the crude diastereomeric mixture of sulfoxides **15** which was used in the next step without further purification.

To the crude sulfoxides **15** in toluene (550 mL, 0.0025 M) was added *O*-methylquinine (0.93 g, 2.74 mmol, 2.0 equiv). After heated at 130 °C for 2 h, the reaction mixture was cooled to room temperature and concentrated in *vacuo* to afford the crude product which was purified by flash chromatography (SiO<sub>2</sub>, 30:1 petroleum ether:EtOAc) to furnish compound **17** (0.264 g, 54%) and **16** (0.054 g, 11%) as a white solid.

**Compound 17**: mp: 117.8 – 120.1 °C; TLC (petroleum ether:EtOAc, 9:1 v/v): *R<sub>f</sub>* = 0.35; [α]<sub>D</sub><sup>20</sup>

+1126.1 (*c* 0.2, CHCl<sub>3</sub>); <sup>1</sup>H NMR (400 MHz, CDCl<sub>3</sub>) δ 5.61 (d, *J* = 5.4 Hz, 1H), 5.45 (d, *J* = 5.4 Hz, 1H), 4.94 (t, *J* = 6.8 Hz, 1H), 4.61 – 4.52 (m, 1H), 3.04 (d, *J* = 11.2 Hz, 1H), 2.90 (dd, *J* = 11.0, 5.4 Hz, 1H), 2.13 (s, 3H), 2.02 (s, 3H), 1.51 – 1.42 (m, 1H), 0.62 (s, 3H); <sup>13</sup>C NMR (101 MHz, CDCl<sub>3</sub>) δ 209.2, 170.1, 149.7, 143.8, 139.3, 120.3, 118.4, 115.2, 74.4, 63.7, 56.4, 52.3, 46.6, 46.1, 38.9, 35.7, 32.6, 31.5, 30.6, 23.6, 22.3, 21.4, 13.5; IR (KBr): ν = 2937, 2852, 1732, 1701, 1636, 1558, 1238, 882 cm<sup>-1</sup>; HRMS (ESI, *m/z*): [M+Na]<sup>+</sup> calcd for C<sub>23</sub>H<sub>30</sub>O<sub>3</sub>Na, 377.2087; found, 377.2088.

**Compound 16:** mp: 140.3 – 142.8 °C; TLC (petroleum ether:EtOAc, 9:1 v/v): *R<sub>f</sub>* = 0.30; [α]<sub>D</sub><sup>27</sup> +79.4 (*c* 0.83, CHCl<sub>3</sub>); <sup>1</sup>H NMR (400 MHz, CDCl<sub>3</sub>) δ 6.18 (d, *J* = 6.0 Hz, 1H), 5.84 (d, *J* = 6.0 Hz, 1H), 4.29 – 4.23 (m, 1H), 2.90 (d, *J* = 9.4 Hz, 1H), 2.86 – 2.77 (m, 1H), 2.73 (t, *J* = 9.3 Hz, 1H), 2.15 (s, 3H), 2.02 (s, 3H), 1.92 – 1.76 (m, 2H), 1.67 (d, *J* = 12.6 Hz, 1H), 1.59 (d, *J* = 4.2 Hz, 1H), 1.46 (qd, *J* = 11.9, 6.4 Hz, 1H), 0.65 (d, *J* = 9.4 Hz, 1H), 0.44 (s, 3H); <sup>13</sup>C NMR (101 MHz, CDCl<sub>3</sub>) δ 209.4, 170.3, 142.4, 129.8, 122.9, 121.7, 106.9, 105.3, 73.7, 63.7, 51.8, 44.0, 41.1, 36.8, 34.8, 31.2, 30.5, 27.8, 24.5, 23.9, 23.7, 21.5, 16.6; IR (KBr): ν = 2962, 2878, 1732, 1700, 1558, 1541, 1240, 796 cm<sup>-1</sup>; HRMS (ESI, *m/z*): [M+H]<sup>+</sup> calcd for C<sub>23</sub>H<sub>31</sub>O<sub>3</sub>, 355.2268; found, 355.2267.

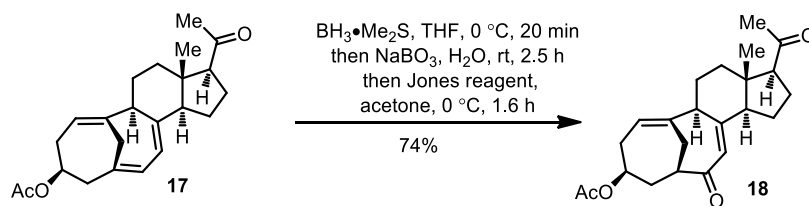

To a stirred solution of **17** (1.06 g, 3.0 mmol, 1.0 equiv) in dry THF (65 mL) at 0 °C was added 92% BH<sub>3</sub>·Me<sub>2</sub>S (0.53 mL, 5.23 mmol, 1.74 equiv). After 10 min, another portion of 92% BH<sub>3</sub>·Me<sub>2</sub>S (0.23 mL, 2.27 mmol, 0.76 equiv) was added and stirring was continued for another 10 min at the same temperature. H<sub>2</sub>O (12 mL) was added to the reaction system, followed by NaBO<sub>3</sub>·4H<sub>2</sub>O (0.92 g, 6.0 mmol, 2.0 equiv), and the resulting mixture was allowed to warm to room temperature and stirred for 2.5 h. Acetone (130 mL) was then added and the reaction mixture was treated with Jones reagent (9.2 mL, 2.6 M, 24.0 mmol, 8.0 equiv) at 0 °C. After 40 min at the

same temperature, another portion of Jones reagent (2.3 mL, 2.6 M, 6.0 mmol, 2.0 equiv) was added. The reaction mixture was stirred for 1 h at 0 °C and quenched with isopropanol (50 mL). The mixture was then filtered through celite and the filtrate was concentrated in *vacuo*. The resulting residue was extracted with EtOAc (3×50 mL). The combined organic layers were washed with brine and dried over Na<sub>2</sub>SO<sub>4</sub>. Removal of the solvent under reduced pressure afforded the crude product which was purified by flash chromatography (SiO<sub>2</sub>, 6:1→4:1 petroleum ether:EtOAc) to furnish compound **18** (0.82 g, 74%) as a white solid.

**Compound 18**: mp: 162.3 – 163.9 °C; TLC (petroleum ether:EtOAc, 2:1 v/v):  $R_f$  = 0.57;  $[\alpha]_D^{25}$  +158.3 (*c* 0.5, CHCl<sub>3</sub>); <sup>1</sup>H NMR (400 MHz, CDCl<sub>3</sub>) δ 5.63 (dd, *J* = 8.0, 6.8 Hz, 1H), 5.61 (s, 1H), 4.56 – 4.47 (m, 1H), 2.87 – 2.79 (m, 2H), 2.78 – 2.68 (m, 2H), 2.59 – 2.54 (m, 2H), 2.15 (s, 3H), 2.00 (s, 3H), 0.63 (s, 3H); <sup>13</sup>C NMR (101 MHz, CDCl<sub>3</sub>) δ 208.6, 204.0, 170.0, 155.8, 145.9, 125.5, 121.8, 67.2, 63.4, 55.7, 53.6, 48.3, 46.5, 38.0, 37.5, 32.7, 31.4, 27.55, 27.53, 23.2, 22.5, 21.4, 13.8; IR (KBr): ν = 2934, 2854, 1734, 1701, 1666, 1617, 1251, 759 cm<sup>-1</sup>; HRMS (ESI, *m/z*) [M+Na]<sup>+</sup> calcd for C<sub>23</sub>H<sub>30</sub>O<sub>4</sub>Na, 393.2036; found, 393.2038.

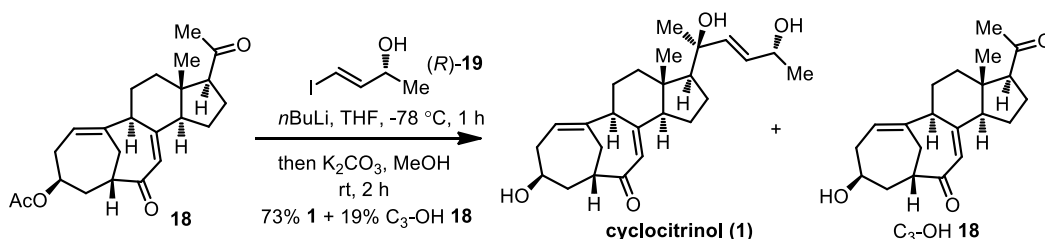

To a stirred solution of (*R*)-vinyl iodide **19** (140 mg, 0.70 mmol, 5.0 equiv) in 2 mL dry THF was added *n*-BuLi (0.62 mL, 2.26 M in hexanes, 1.4 mmol, 10.0 equiv) at -78 °C. The reaction mixture was stirred for 30 min at the same temperature before it was treated with a solution of ketone **18** (52 mg, 0.14 mmol, 1.0 equiv) in THF (2 mL) and stirred for 0.5 h until it was quenched with MeOH (6 mL). The mixture was allowed to warm to room temperature and K<sub>2</sub>CO<sub>3</sub> (96 mg, 0.70 mmol, 5.0 equiv) was added. After stirring was continued for 2 h at the same temperature, the resulting mixture was concentrated and the residue was treated with sat. aq. NH<sub>4</sub>Cl (2.5 mL) and diluted with EtOAc (10 mL). The layers were separated, and the aqueous phase was extracted with

EtOAc (3×5 mL). The combined organic extracts were washed with brine, dried over Na<sub>2</sub>SO<sub>4</sub>. Removal of the solvent under reduced pressure afforded the crude product which was purified by flash chromatography (SiO<sub>2</sub>, 2:1→1:1 petroleum ether:EtOAc to 50:1→30:1 DCM:MeOH) to furnish compound C<sub>3</sub>-OH **18** (9 mg, 19%) and cyclocitrinol (**1**) (41 mg, 73%) as a white solid.

**cyclocitrinol (1)**: mp: 177.5 – 179.9 °C; TLC (DCM:MeOH, 19:1 v/v): *R<sub>f</sub>* = 0.32; [ $\alpha$ ]<sub>D</sub><sup>25</sup> +138.2 (*c* 0.3, MeOH); <sup>1</sup>H NMR (600 MHz, DMSO-*d*<sub>6</sub>)  $\delta$  5.63 (dd, *J* = 15.6, 1.3 Hz, 1H), 5.53 (dd, *J* = 8.3, 6.3 Hz, 1H), 5.49 (dd, *J* = 15.6, 5.4 Hz, 1H), 5.37 (s, 1H), 4.61 (d, *J* = 4.4 Hz, 1H), 4.57 (d, *J* = 4.6 Hz, 1H), 4.21 (s, 1H), 4.11 – 4.06 (m, 1H), 3.13 – 3.08 (m, 1H), 2.78 (dd, *J* = 12.1, 5.5 Hz, 1H), 2.33 (ddd, *J* = 13.1, 11.2, 6.3 Hz, 1H), 1.20 (s, 3H), 1.09 (d, *J* = 6.4 Hz, 3H), 0.71 (s, 3H); <sup>13</sup>C NMR (126 MHz, DMSO-*d*<sub>6</sub>)  $\delta$  204.1, 157.1, 145.7, 136.0, 130.8, 124.5, 122.0, 73.3, 66.3, 63.1, 60.1, 55.3, 53.2, 48.1, 45.9, 41.4, 38.9, 36.0, 28.9, 27.5, 27.2, 24.1, 22.3, 22.1, 14.4; IR (KBr):  $\nu$  = 3396, 2948, 2871, 1645, 1616, 1367, 1030, 735 cm<sup>-1</sup>; HRMS (ESI, *m/z*) [M+H]<sup>+</sup> calcd for C<sub>25</sub>H<sub>37</sub>O<sub>4</sub>, 401.2686; found, 401.2687.

**Compound C<sub>3</sub>-OH 18**: mp: 181.7 – 183.4 °C; TLC (petroleum ether:EtOAc, 1:1 v/v): *R<sub>f</sub>* = 0.43; [ $\alpha$ ]<sub>D</sub><sup>27</sup> +154.2 (*c* 0.33, CHCl<sub>3</sub>); <sup>1</sup>H NMR (400 MHz, CDCl<sub>3</sub>)  $\delta$  5.62 – 5.55 (m, 2H), 3.55 – 3.43 (m, 1H), 2.89 (brd, *J* = 12.7 Hz, 1H), 2.81 (dd, *J* = 12.2, 5.4 Hz, 1H), 2.77 – 2.68 (m, 2H), 2.58 – 2.43 (m, 3H), 2.15 (s, 3H), 1.91 – 1.52 (m, 9H), 0.63 (s, 3H); <sup>13</sup>C NMR (126 MHz, CDCl<sub>3</sub>)  $\delta$  208.8, 205.0, 156.1, 145.6, 125.7, 122.5, 64.6, 63.6, 55.9, 53.9, 48.7, 46.7, 41.7, 38.2, 35.8, 31.6, 27.7, 27.7, 23.3, 22.6, 13.9; IR (KBr):  $\nu$  = 3445, 2949, 2869, 1700, 1684, 1617, 1178, 868 cm<sup>-1</sup>; HRMS (ESI, *m/z*) [M+H]<sup>+</sup> calcd for C<sub>21</sub>H<sub>29</sub>O<sub>3</sub>, 329.2111; found, 329.2109.

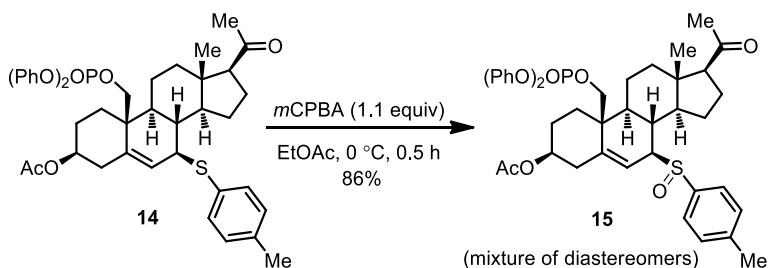

To a solution of **14** (300 mg, 0.41 mmol, 1.0 equiv) in EtOAc (10 mL) was added 85% *m*-CPBA (93 mg, 0.45 mmol, 1.1 equiv) at 0 °C. After stirred at this temperature for 0.5 h, the reaction mixture was quenched with sat. aq. Na<sub>2</sub>SO<sub>3</sub> and extracted with EtOAc (3×10 mL). The combined organic layers were washed with brine and dried over Na<sub>2</sub>SO<sub>4</sub>. Removal of the solvent under reduced pressure afforded the crude product which was purified by flash chromatography (SiO<sub>2</sub>, 3:1→2:1→1:1 petroleum ether:EtOAc) to furnish **15**-major isomer (210 mg, 68%) and **15**-minor isomer (55 mg, 18%) as white foam.

**Compound 15-minor isomer:** mp 80.5 – 81.9 °C; TLC (petroleum ether:EtOAc, 2:1 v/v):  $R_f$  = 0.25;  $[\alpha]_D^{24}$  +234.2 (*c* 0.92, CHCl<sub>3</sub>); <sup>1</sup>H NMR (400 MHz, CDCl<sub>3</sub>) δ 7.40 – 7.15 (m, 14H), 4.89 (s, 1H), 4.53 – 4.45 (m, 1H), 4.39 (d, *J* = 4.4 Hz, 2H), 3.00 (d, *J* = 8.5 Hz, 1H), 2.42 (s, 3H), 2.13 (s, 3H), 1.99 (s, 3H), 1.49 – 1.41 (m, 1H), 1.37 – 1.30 (m, 1H), 1.16 – 1.09 (m, 1H), 1.03 – 0.95 (m, 1H), 0.59 (s, 3H); <sup>13</sup>C NMR (101 MHz, CDCl<sub>3</sub>) δ 208.8, 170.6, 150.51 (d, *J*<sub>C-P</sub> = 7.4 Hz), 150.47 (d, *J*<sub>C-P</sub> = 7.2 Hz), 145.0, 141.0, 138.3, 129.79, 129.78, 129.77, 125.4, 125.3, 124.0, 120.17 (d, *J*<sub>C-P</sub> = 5.3 Hz), 120.12 (d, *J*<sub>C-P</sub> = 5.3 Hz), 118.0, 72.1, 68.2 (d, *J*<sub>C-P</sub> = 8.0 Hz), 67.0, 62.9, 57.1, 50.4, 44.7, 40.3 (d, *J*<sub>C-P</sub> = 8.2 Hz), 39.2, 38.2, 33.3, 31.5, 30.3, 27.1, 26.5, 22.9, 22.6, 21.4, 21.3, 13.5; IR (KBr): ν = 2945, 1732, 1702, 1590, 1489, 1456, 1025, 774 cm<sup>-1</sup>; HRMS (ESI, *m/z*) [M+Na]<sup>+</sup> calcd for C<sub>42</sub>H<sub>49</sub>O<sub>8</sub>NaPS, 767.2778; found, 767.2780.

**Compound 15-major isomer:** mp 79.5 – 80.9 °C; TLC (petroleum ether:EtOAc, 2:1 v/v):  $R_f$  = 0.13;  $[\alpha]_D^{24}$  +120.8 (*c* 1.04, CHCl<sub>3</sub>); <sup>1</sup>H NMR (400 MHz, CDCl<sub>3</sub>) δ 7.42 – 7.09 (m, 14H), 5.98 (s, 1H), 4.62 – 4.54 (m, 1H), 3.66 – 3.61 (m, 1H), 3.30 (dd, *J* = 11.4, 4.3 Hz, 1H), 2.60 – 2.52 (m, 2H), 2.40 (dd, *J* = 11.4, 3.3 Hz, 1H), 2.30 (s, 3H), 2.13 (s, 3H), 2.04 (s, 3H), 1.21 – 1.11 (m, 1H), 1.10 – 1.02 (m, 1H), 0.91 – 0.81 (m, 1H), 0.63 (s, 3H); <sup>13</sup>C NMR (101 MHz, CDCl<sub>3</sub>) δ 208.8, 170.3, 150.39 (d, *J*<sub>C-P</sub> = 7.6 Hz), 150.32 (d, *J*<sub>C-P</sub> = 7.6 Hz), 143.2, 141.8, 135.5, 129.9, 129.8, 128.9, 127.1, 125.53, 125.47, 119.9 (d, *J*<sub>C-P</sub> = 4.8 Hz), 119.8 (d, *J*<sub>C-P</sub> = 5.1 Hz), 119.1, 71.8, 65.9 (d, *J*<sub>C-P</sub> = 7.3 Hz), 65.1, 62.8, 56.3, 49.4, 44.3, 40.3 (d, *J*<sub>C-P</sub> = 8.6 Hz), 38.8, 37.6, 32.3, 31.5, 29.5, 27.0, 26.9, 22.9, 22.3, 21.4, 21.3, 13.4; IR (KBr): ν = 2945, 1732, 1701, 1591, 1489, 1456, 1037, 775

cm<sup>-1</sup>; HRMS (ESI, *m/z*) [M+Na]<sup>+</sup> calcd for C<sub>42</sub>H<sub>49</sub>O<sub>8</sub>NaPS, 767.2778; found, 767.2770.

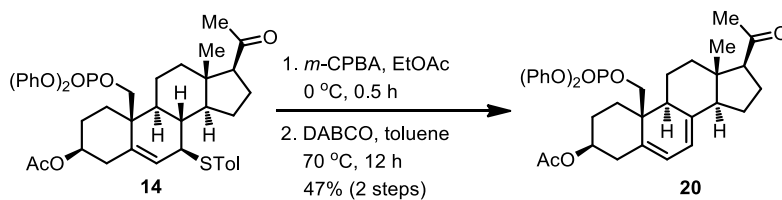

To a solution of **14** (1.0 g, 1.37 mmol, 1.0 equiv) in EtOAc (28 mL) was added 85% *m*-CPBA (0.3 g, 1.44 mmol, 1.05 equiv) at °C. After stirred at this temperature for 0.5 h, the reaction mixture was quenched with sat. aq. Na<sub>2</sub>SO<sub>3</sub> and extracted with EtOAc (3×40 mL). The combined organic layers were washed with brine and dried over Na<sub>2</sub>SO<sub>4</sub>. Removal of the solvent under reduced pressure afforded the crude sulfoxides **15** which was used in the next step without further purification. The crude sulfoxides obtained above were dissolved in 138 mL toluene. DABCO (307 mg, 2.74 mmol, 2.0 equiv) was added and the mixture was heated at 70 °C for 12 h. The reaction mixture was cooled to room temperature and concentrated in *vacuo* to afford the crude product which was purified by flash chromatography (SiO<sub>2</sub>, 6:1→5:1 petroleum ether:EtOAc) to furnish compound **20** (388 mg, 47%) as a yellow solid.

**Compound 20**: mp: 84.4 – 86.0 °C; TLC (petroleum ether:EtOAc, 1:1 v/v): *R<sub>f</sub>* = 0.52; [ $\alpha$ ]<sub>D</sub><sup>24</sup> –8.2 (*c* 0.56, CHCl<sub>3</sub>); <sup>1</sup>H NMR (400 MHz, CDCl<sub>3</sub>)  $\delta$  7.36 – 7.28 (m, 4H), 7.22 – 7.15 (m, 6H), 5.70 – 5.65 (m, 1H), 5.32 – 5.27 (m, 1H), 4.73 – 4.63 (m, 1H), 4.34 (dd, *J* = 10.6, 4.4 Hz, 1H), 4.14 (dd, *J* = 10.6, 4.3 Hz, 1H), 2.59 (t, *J* = 8.7 Hz, 1H), 2.55 – 2.46 (m, 1H), 2.35 (t, *J* = 13.0 Hz, 1H), 2.12 (s, 3H), 2.02 (s, 3H), 0.46 (s, 3H); <sup>13</sup>C NMR (126 MHz, CDCl<sub>3</sub>)  $\delta$  209.1, 170.7, 150.67 (d, *J*<sub>C-P</sub> = 7.6 Hz), 150.65 (d, *J*<sub>C-P</sub> = 7.6 Hz), 140.4, 132.1, 129.89, 129.86, 125.5, 125.4, 124.3, 120.2 (d, *J*<sub>C-P</sub> = 5.0 Hz), 120.1 (d, *J*<sub>C-P</sub> = 5.0 Hz), 117.1, 72.0, 67.8 (d, *J*<sub>C-P</sub> = 7.6 Hz), 63.3, 54.7, 46.0, 44.4, 41.1 (d, *J*<sub>C-P</sub> = 7.6 Hz), 38.5, 36.8, 33.2, 31.5, 27.9, 23.2, 22.8, 22.6, 21.5, 13.3; IR (KBr):  $\nu$  = 2945, 2883, 1731, 1702, 1590, 1489, 1024, 748 cm<sup>-1</sup>; HRMS (ESI, *m/z*) [M+Na]<sup>+</sup> calcd for C<sub>35</sub>H<sub>41</sub>O<sub>7</sub>NaP, 627.2482; found, 627.2482.

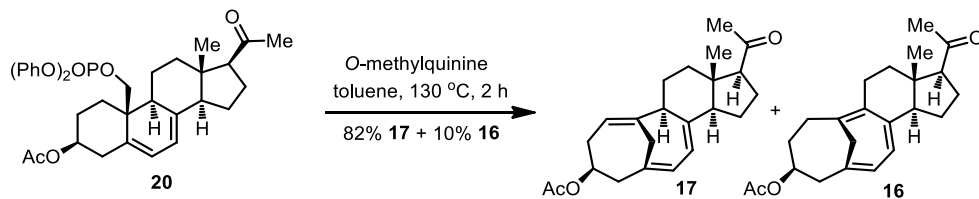

To a solution of **20** (20 mg, 0.033 mmol, 1.0 equiv) in toluene (13.2 mL, 0.0025 M) was added *O*-methylquinine (22.4 mg, 0.066 mmol, 2.0 equiv). After heated at  $130\text{ }^\circ\text{C}$  for 2 h, the reaction mixture was cooled to room temperature and concentrated in *vacuo* to afford the crude product, which was purified by flash chromatography ( $\text{SiO}_2$ , 30:1 petroleum ether:EtOAc) to furnish compound **17** (9.7 mg, 82%) and **16** (1.2 mg, 10%) as white solids.

#### 4. NMR comparison of synthetic and natural cyclocitrinol

##### <sup>1</sup>H NMR data comparison of synthetic and natural cyclocitrinol

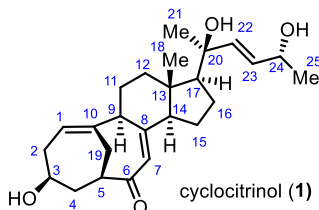

| Position | Natural cyclocitrinol <sup>3</sup><br>(600 MHz in DMSO- <i>d</i> <sub>6</sub> ) | Synthetic cyclocitrinol<br>(600 MHz in DMSO- <i>d</i> <sub>6</sub> ) | Δδ   |
|----------|---------------------------------------------------------------------------------|----------------------------------------------------------------------|------|
| 1        | 5.53 (dd, <i>J</i> = 8.7, 6.8 Hz)                                               | 5.53 (dd, <i>J</i> = 8.3, 6.3 Hz)                                    | 0    |
| 3        | 3.11 (m)                                                                        | 3.13 – 3.08 (m)                                                      | 0    |
| 5        | 2.67 (m)                                                                        | 2.68 – 2.65 (m)                                                      | 0    |
| 7        | 5.38 (s)                                                                        | 5.37 (s)                                                             | 0.01 |
| 9        | 2.78 (dd, <i>J</i> = 12.4, 5.5 Hz)                                              | 2.78 (dd, <i>J</i> = 12.1, 5.5 Hz)                                   | 0    |
| 18       | 0.71 (s)                                                                        | 0.70 (s)                                                             | 0.01 |
| 21       | 1.20 (s)                                                                        | 1.19 (s)                                                             | 0.01 |
| 22       | 5.62 (dd, <i>J</i> = 15.6, 1.3 Hz)                                              | 5.63 (dd, <i>J</i> = 15.6, 1.3 Hz)                                   | 0.01 |
| 23       | 5.49 (dd, <i>J</i> = 15.6, 5.5 Hz)                                              | 5.49 (dd, <i>J</i> = 15.6, 5.4 Hz)                                   | 0    |
| 24       | 4.10 (m)                                                                        | 4.11 – 4.06 (m)                                                      | 0.01 |
| 25       | 1.08 (d, <i>J</i> = 6.4 Hz)                                                     | 1.08 (d, <i>J</i> = 6.4 Hz)                                          | 0    |
| 3-OH     | 4.61 (d, <i>J</i> = 4.5 Hz)                                                     | 4.61 (d, <i>J</i> = 4.4 Hz)                                          | 0    |
| 24-OH    | 4.57 (d, <i>J</i> = 4.5 Hz)                                                     | 4.57 (d, <i>J</i> = 4.6 Hz)                                          | 0    |

# <sup>13</sup>C NMR data comparison of synthetic and natural cyclocitrinol

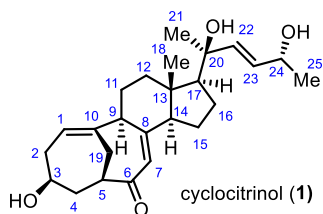

| Position | Natural cyclocitrinol <sup>3</sup><br>(150 MHz in DMSO- <i>d</i> <sub>6</sub> ) | Synthetic cyclocitrinol<br>(126 MHz in DMSO- <i>d</i> <sub>6</sub> ) | Δδ  |
|----------|---------------------------------------------------------------------------------|----------------------------------------------------------------------|-----|
| 1        | 121.9                                                                           | 122.0                                                                | 0.1 |
| 2        | 35.9                                                                            | 36.0                                                                 | 0.1 |
| 3        | 63.1                                                                            | 63.1                                                                 | 0   |
| 4        | 41.3                                                                            | 41.4                                                                 | 0.1 |
| 5        | 48.1                                                                            | 48.1                                                                 | 0   |
| 6        | 204.1                                                                           | 204.1                                                                | 0   |
| 7        | 124.5                                                                           | 124.5                                                                | 0   |
| 8        | 157.1                                                                           | 157.1                                                                | 0   |
| 9        | 53.2                                                                            | 53.2                                                                 | 0   |
| 10       | 145.7                                                                           | 145.7                                                                | 0   |
| 11       | 27.5                                                                            | 27.5                                                                 | 0   |
| 12       | 38.8                                                                            | 38.9                                                                 | 0   |
| 13       | 45.9                                                                            | 45.9                                                                 | 0   |
| 14       | 55.2                                                                            | 55.3                                                                 | 0.1 |
| 15       | 22.1                                                                            | 22.1                                                                 | 0   |
| 16       | 22.3                                                                            | 22.3                                                                 | 0   |
| 17       | 60.1                                                                            | 60.1                                                                 | 0   |
| 18       | 14.3                                                                            | 14.4                                                                 | 0.1 |
| 19       | 27.1                                                                            | 27.2                                                                 | 0.1 |
| 20       | 73.3                                                                            | 73.3                                                                 | 0   |
| 21       | 28.9                                                                            | 28.9                                                                 | 0   |
| 22       | 136.0                                                                           | 136.0                                                                | 0   |
| 23       | 130.8                                                                           | 130.8                                                                | 0   |
| 24       | 66.3                                                                            | 66.3                                                                 | 0   |
| 25       | 24.0                                                                            | 24.1                                                                 | 0.1 |

# NMR spectra comparison of synthetic and natural cyclocitrinol

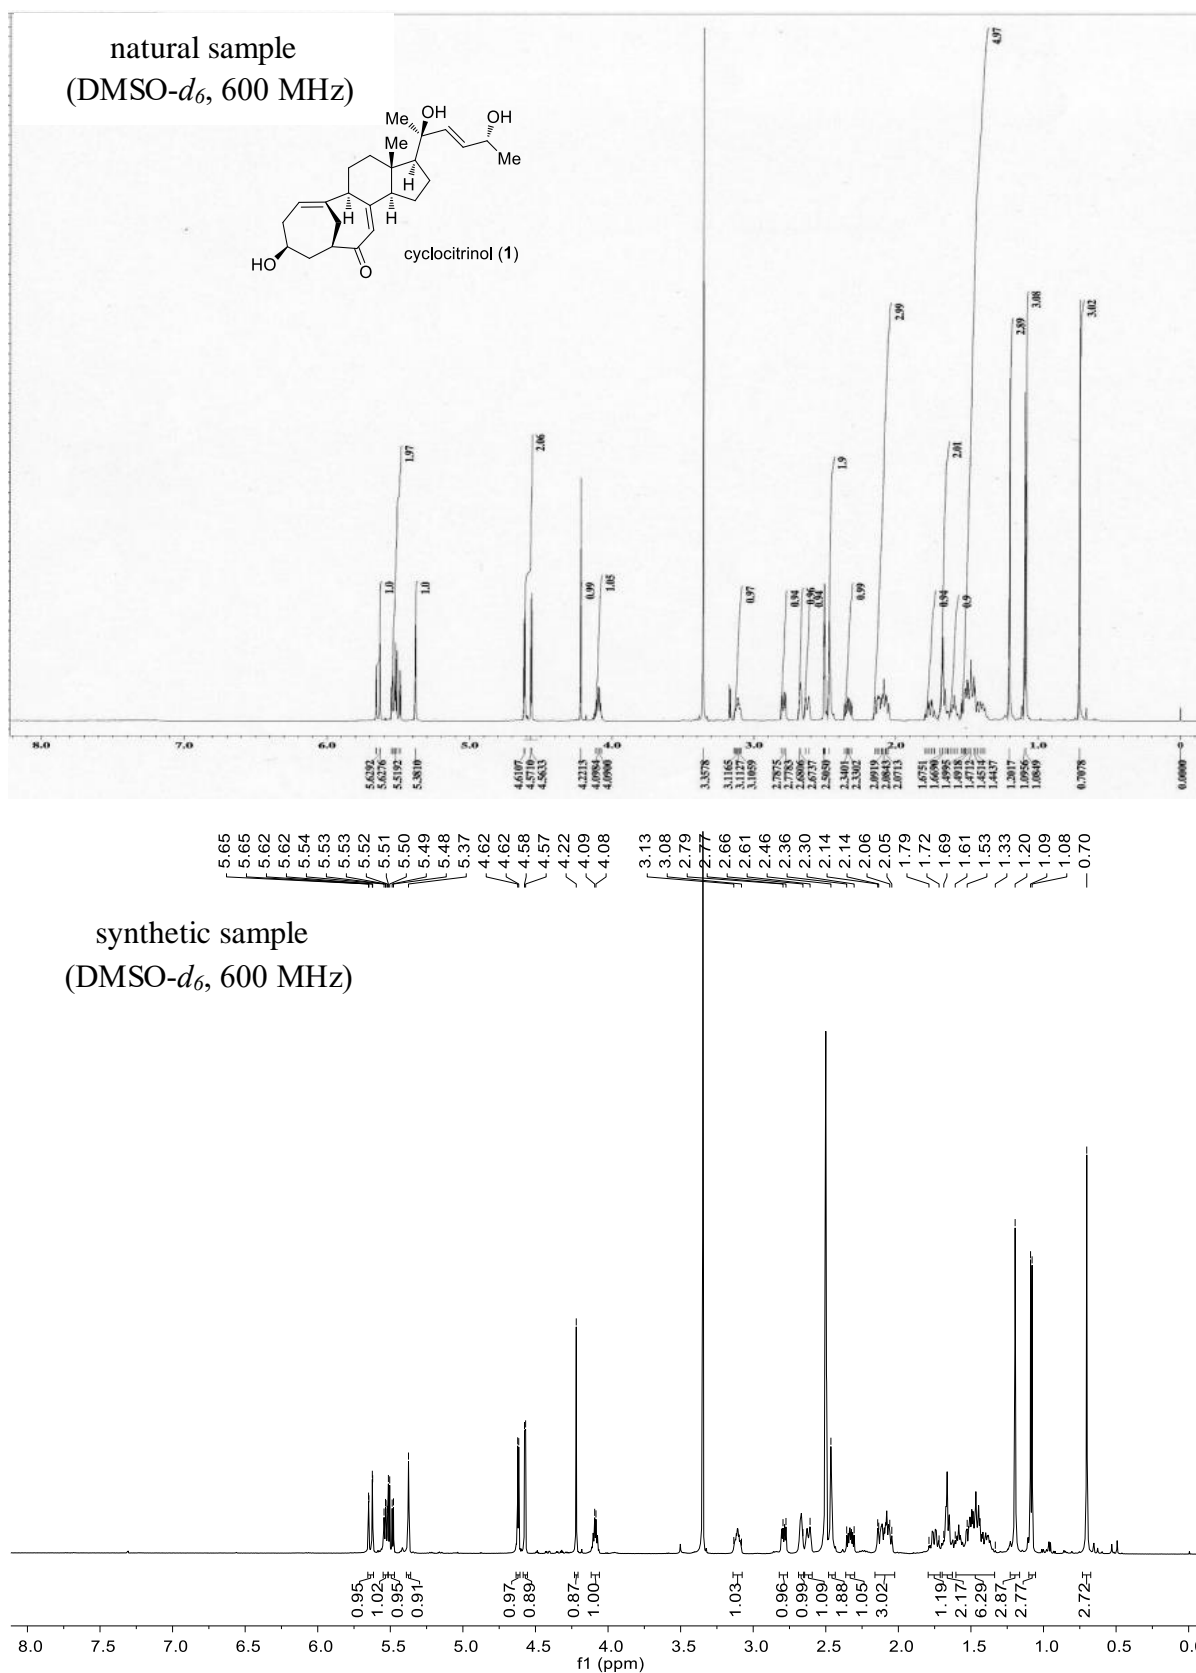

natural sample  
(DMSO-*d*<sub>6</sub>, 150 MHz)

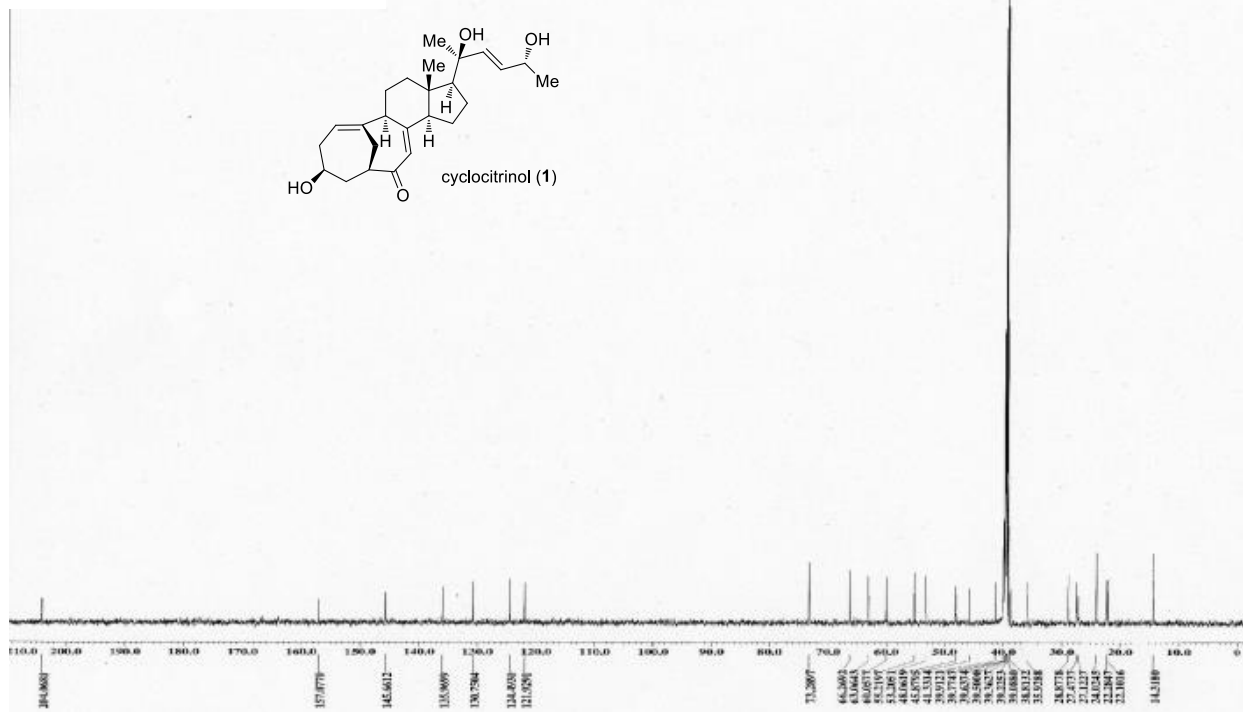

synthetic sample  
(DMSO-*d*<sub>6</sub>, 126 MHz)

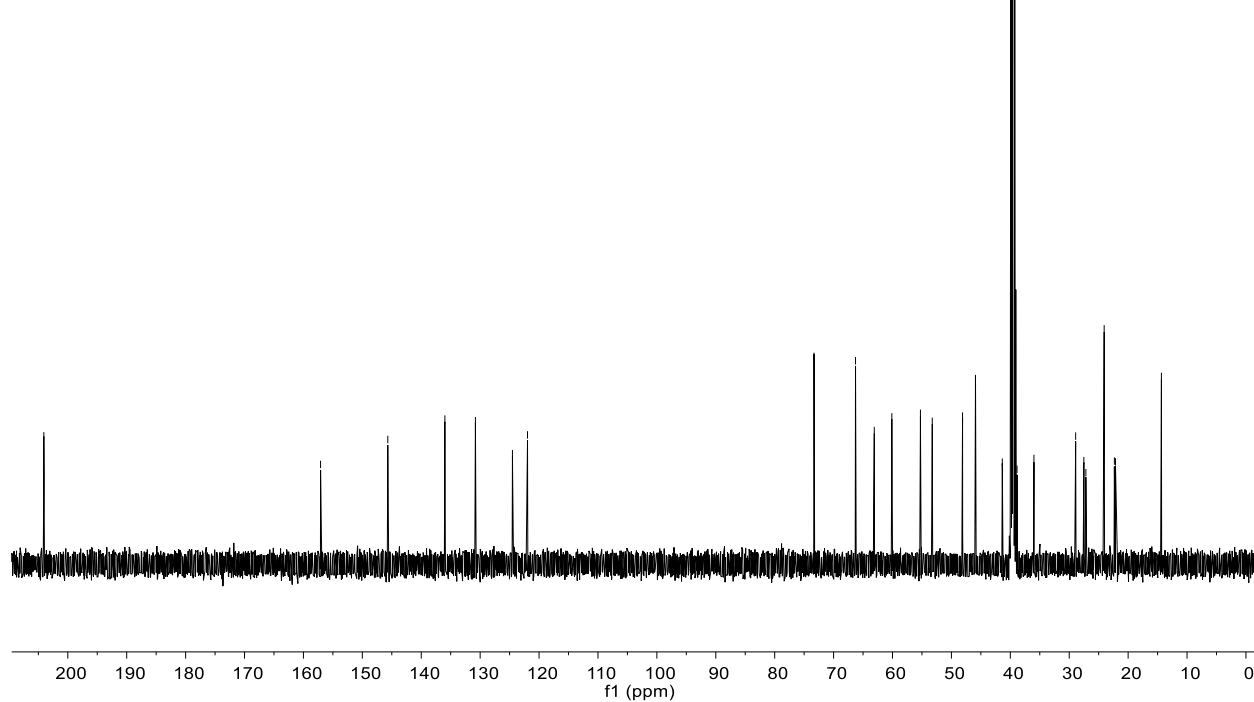

## 5. X-ray crystallographic data for 18

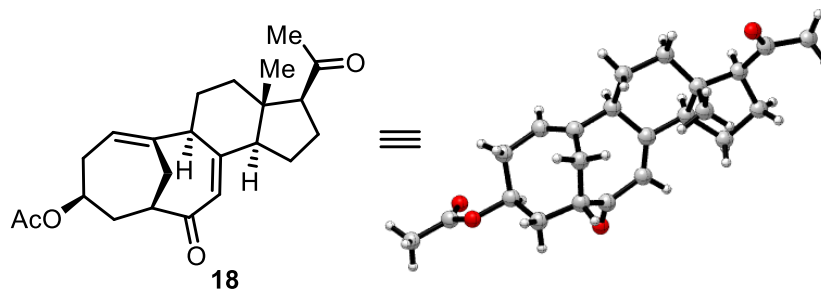

**Table S2. Crystal data and structure refinement for CCDC 1837109.**

|                                 |                                                |          |
|---------------------------------|------------------------------------------------|----------|
| Identification code             | CCDC 1837109                                   |          |
| Empirical formula               | C <sub>23</sub> H <sub>30</sub> O <sub>4</sub> |          |
| Formula weight                  | 370.47                                         |          |
| Temperature                     | 296(2) K                                       |          |
| Wavelength                      | 1.54178 Å                                      |          |
| Crystal system                  | Orthorhombic                                   |          |
| Space group                     | P 21 21 21                                     |          |
| Unit cell dimensions            | a = 6.70030(10) Å                              | α = 90°. |
|                                 | b = 14.5512(3) Å                               | β = 90°. |
|                                 | c = 20.4826(4) Å                               | γ = 90°. |
| Volume                          | 1997.00(6) Å <sup>3</sup>                      |          |
| Z                               | 4                                              |          |
| Density (calculated)            | 1.232 Mg/m <sup>3</sup>                        |          |
| Absorption coefficient          | 0.662 mm <sup>-1</sup>                         |          |
| F(000)                          | 800                                            |          |
| Crystal size                    | 0.200 x 0.160 x 0.120 mm <sup>3</sup>          |          |
| Theta range for data collection | 6.456 to 66.500°.                              |          |
| Index ranges                    | -7 ≤ h ≤ 7, -17 ≤ k ≤ 17, -24 ≤ l ≤ 21         |          |
| Reflections collected           | 16139                                          |          |
| Independent reflections         | 3452 [R(int) = 0.0287]                         |          |
| Completeness to theta = 67.679° | 95.4 %                                         |          |
| Absorption correction           | Semi-empirical from equivalents                |          |
| Max. and min. transmission      | 0.7533 and 0.6267                              |          |

|                                      |                                       |
|--------------------------------------|---------------------------------------|
| Refinement method                    | Full-matrix least-squares on $F^2$    |
| Data / restraints / parameters       | 3452 / 0 / 248                        |
| Goodness-of-fit on $F^2$             | 1.051                                 |
| Final R indices [ $I > 2\sigma(I)$ ] | $R_1 = 0.0374$ , $wR_2 = 0.1049$      |
| R indices (all data)                 | $R_1 = 0.0382$ , $wR_2 = 0.1059$      |
| Absolute structure parameter         | 0.06(6)                               |
| Largest diff. peak and hole          | 0.217 and -0.204 e. $\text{\AA}^{-3}$ |

## 6. References

- (1) Hazra, B. G.; Basu, S.; Bahule, B. B.; Pore, V. S.; Vyas, B. N.; Ramraj, V. M. *Tetrahedron* **1997**, *53*, 4909.
- (2) (a) Terasawa, T.; Okada, T. *Tetrahedron* **1986**, *42*, 537; (b) Kranz, D. P.; Meier zu Greffen, A.; El Sheikh, S.; Neudoerfl, J. M.; Schmalz, H.-G. *Eur. J. Org. Chem.* **2011**, 2860.
- (3) Du, L.; Zhu, T.; Fang, Y.; Gu, Q.; Zhu, W. *J. Nat. Prod.* **2008**, *71*, 1343.

## 7. NMR spectra

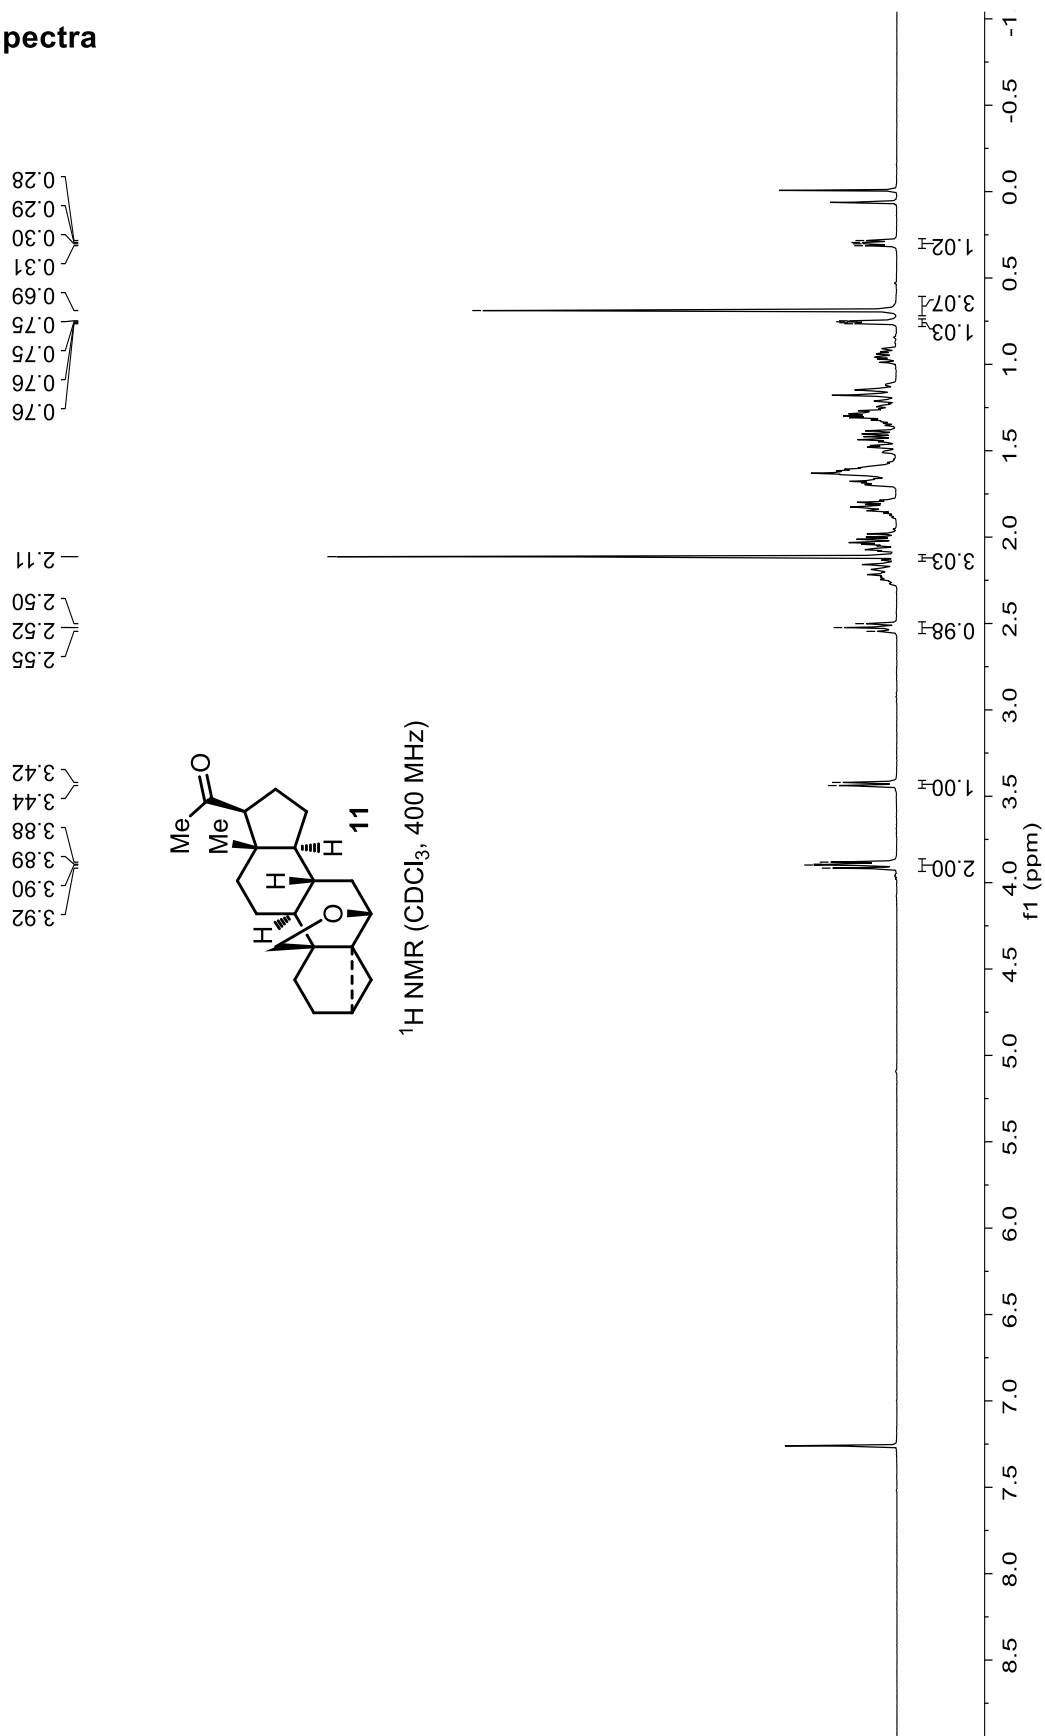

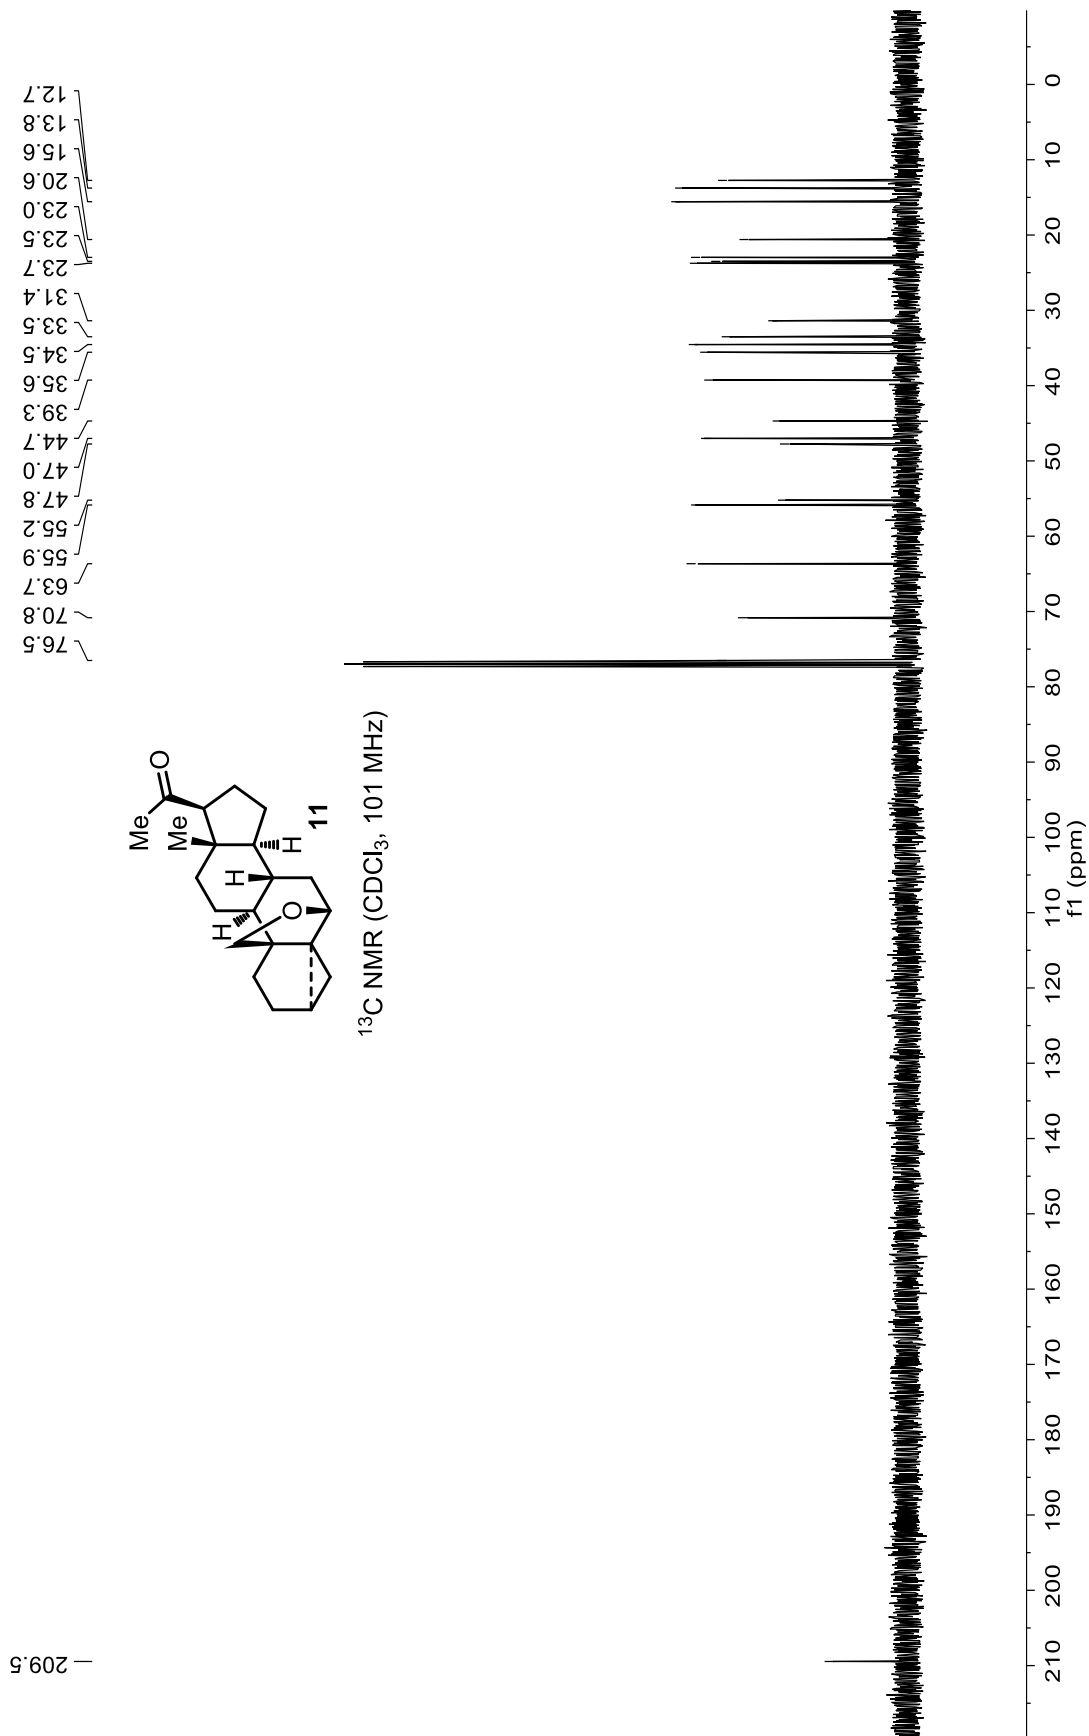

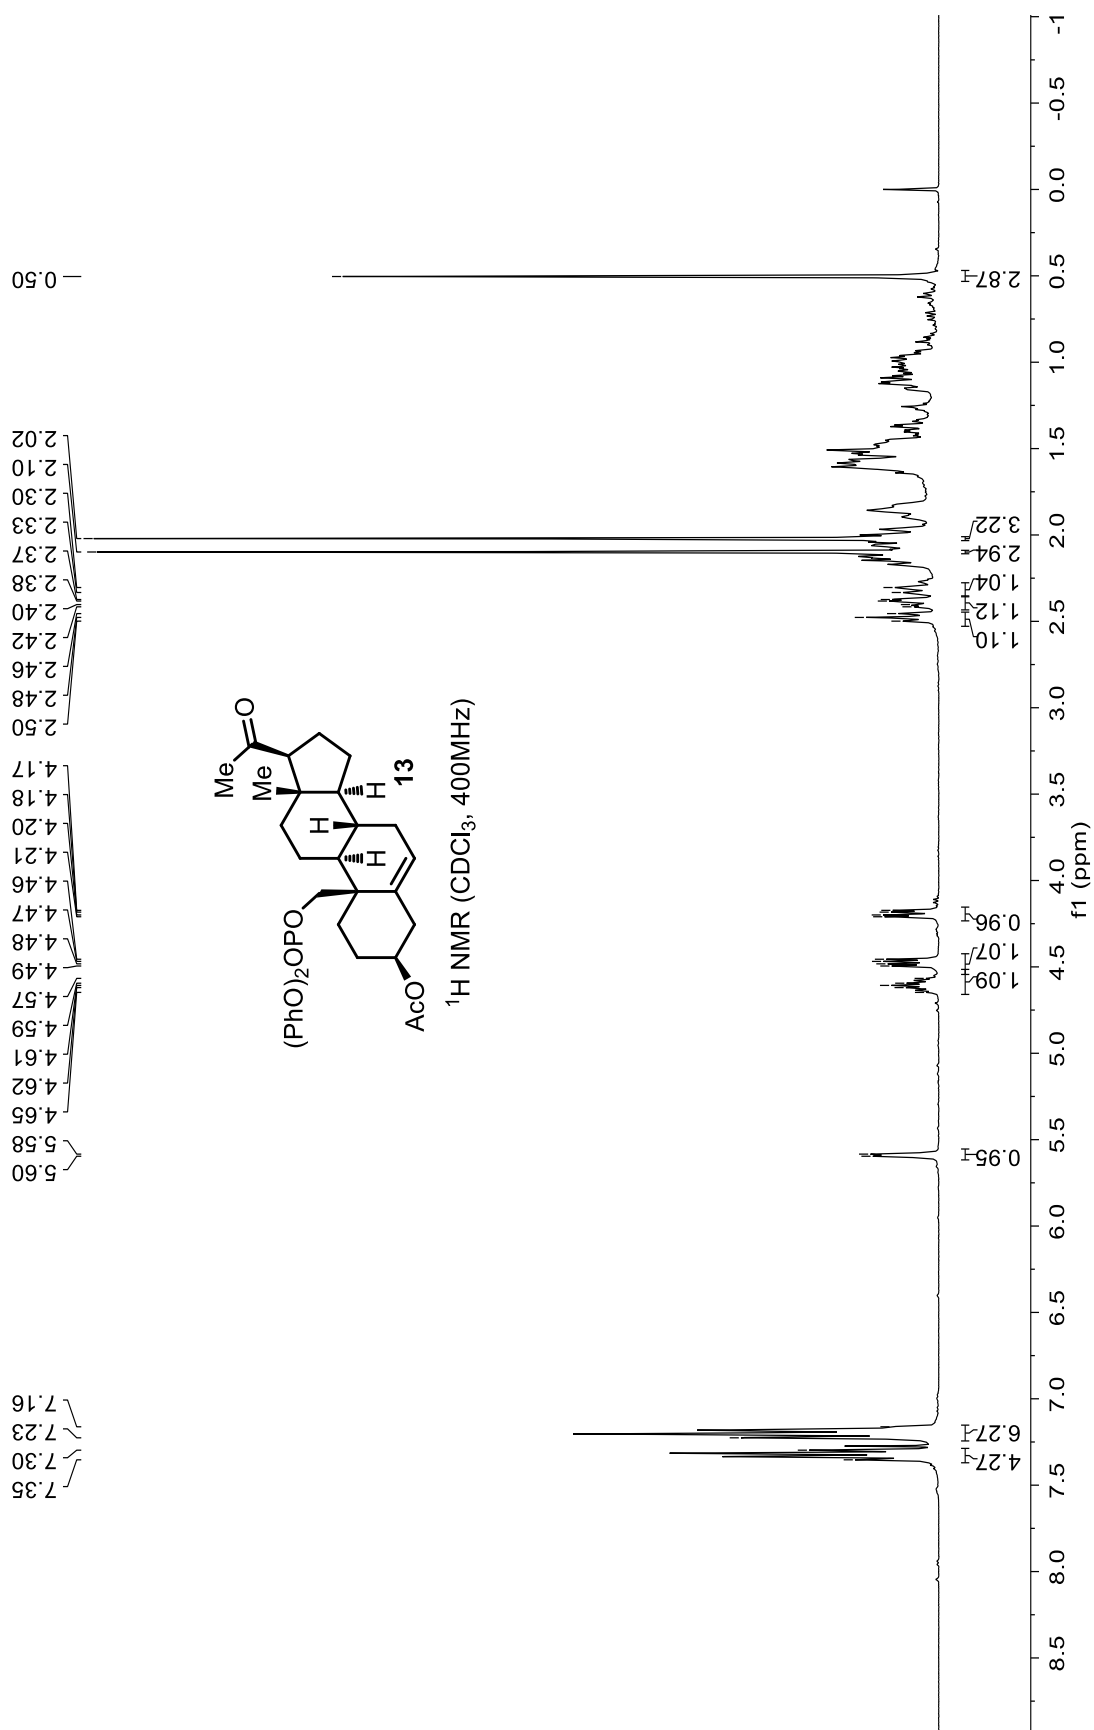

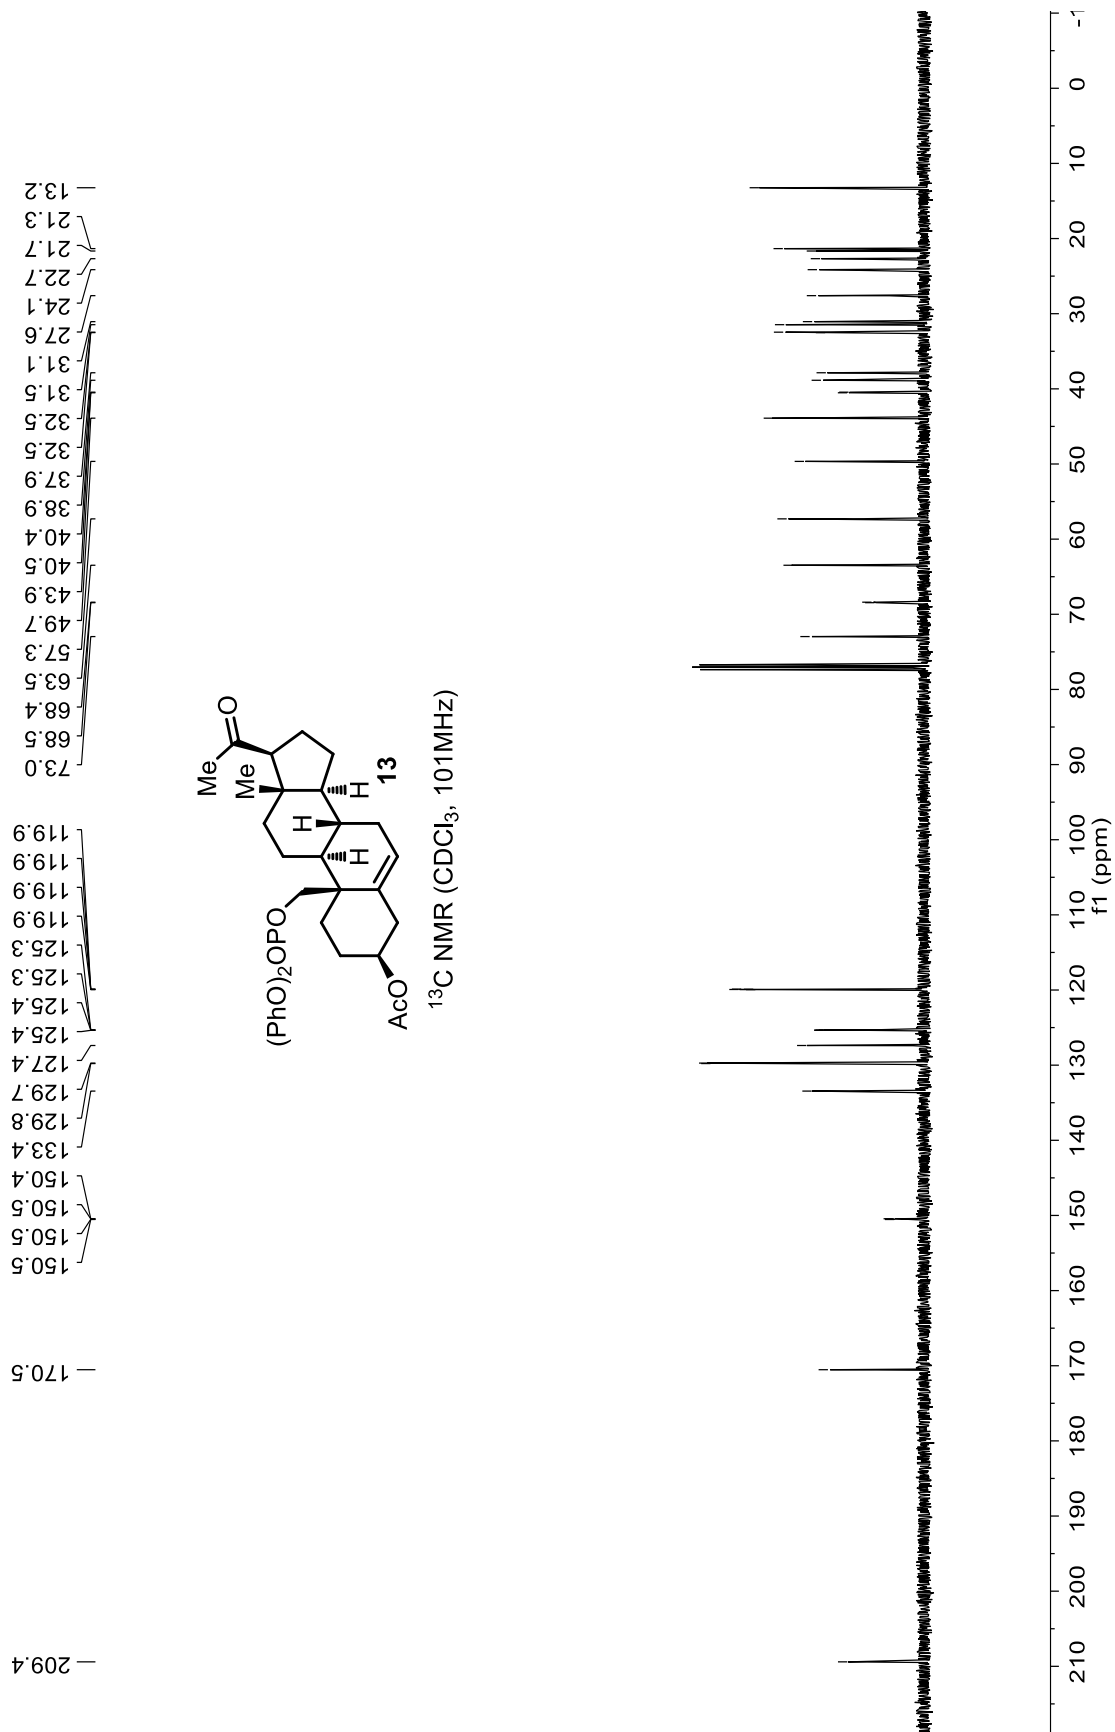

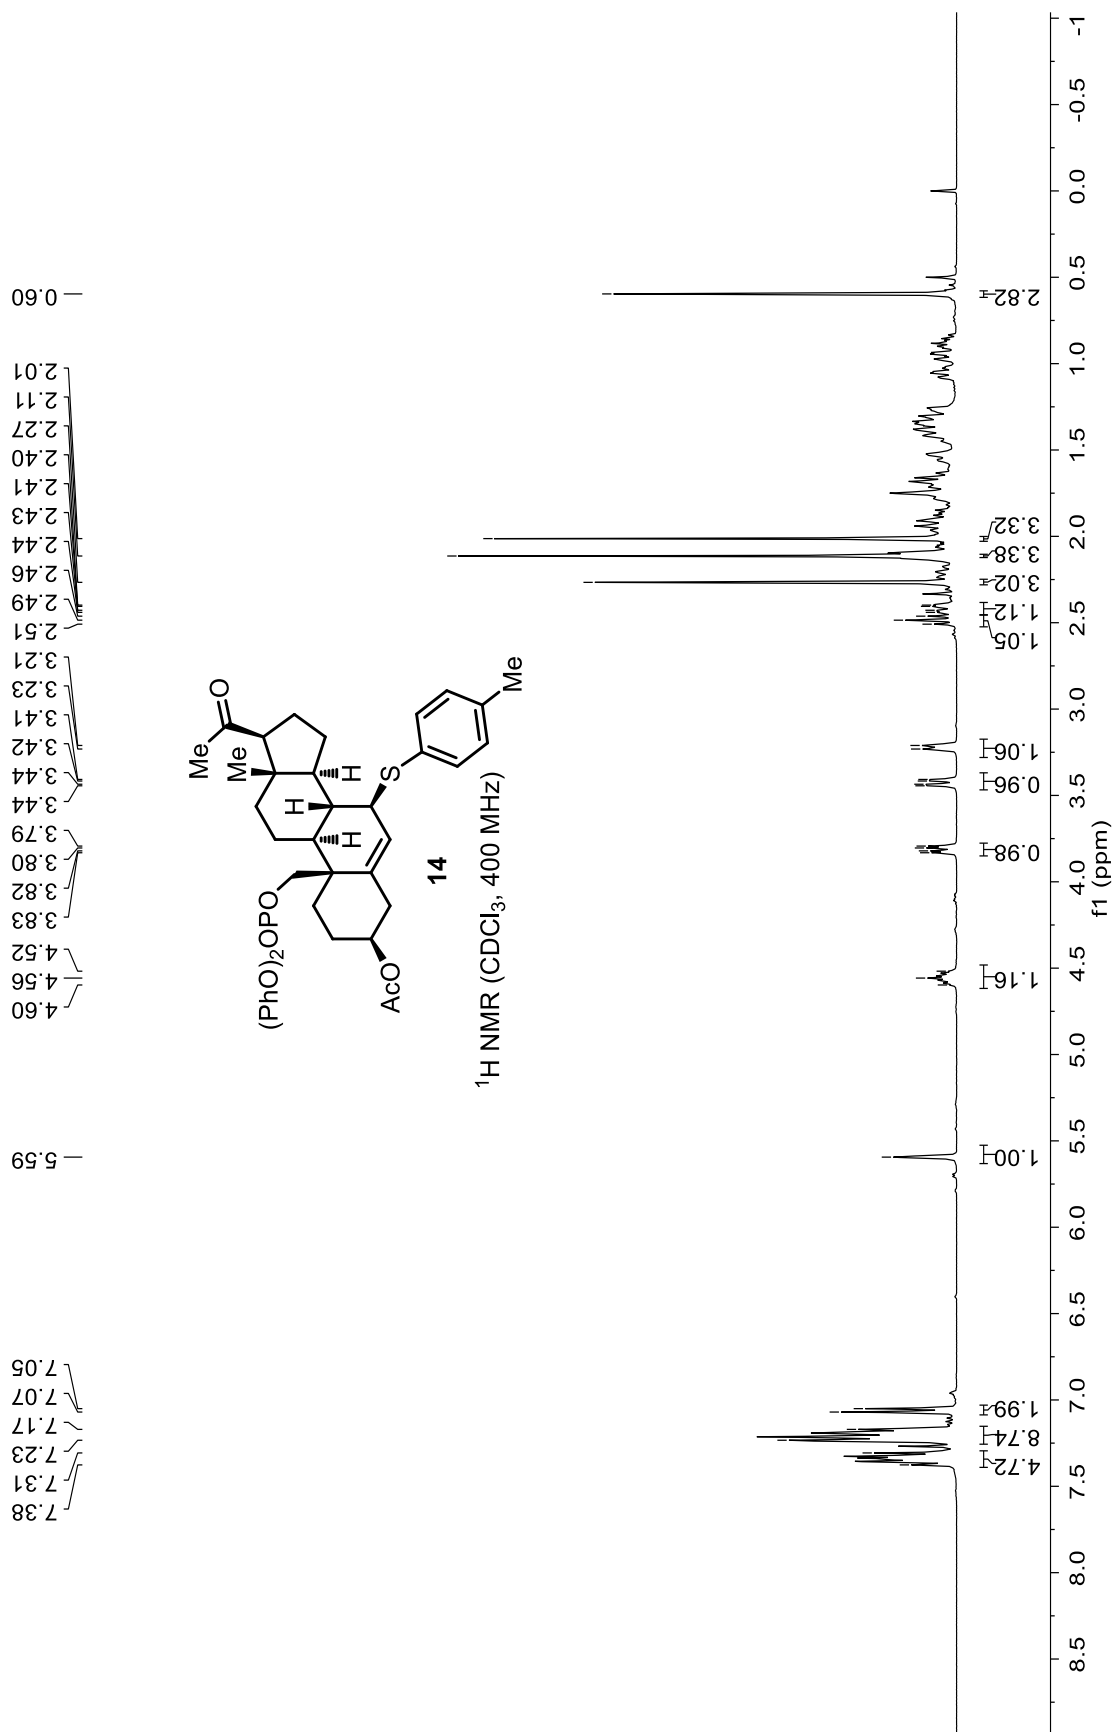

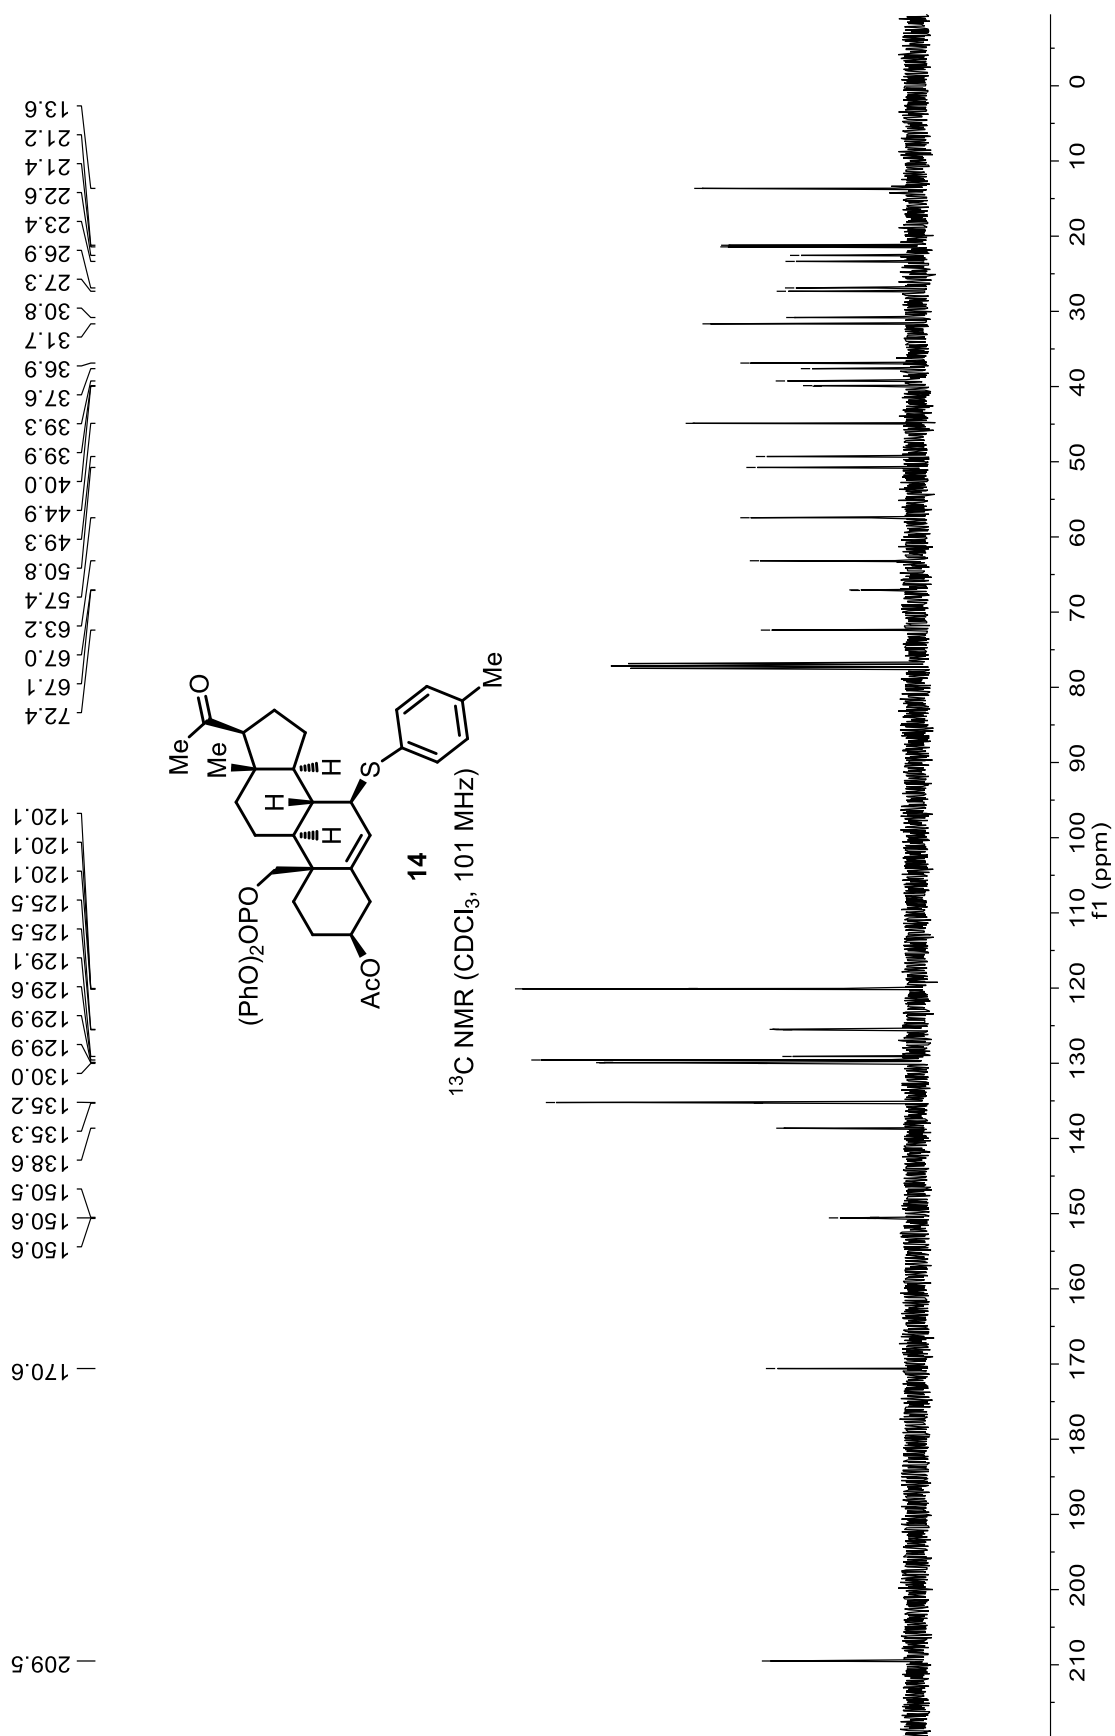

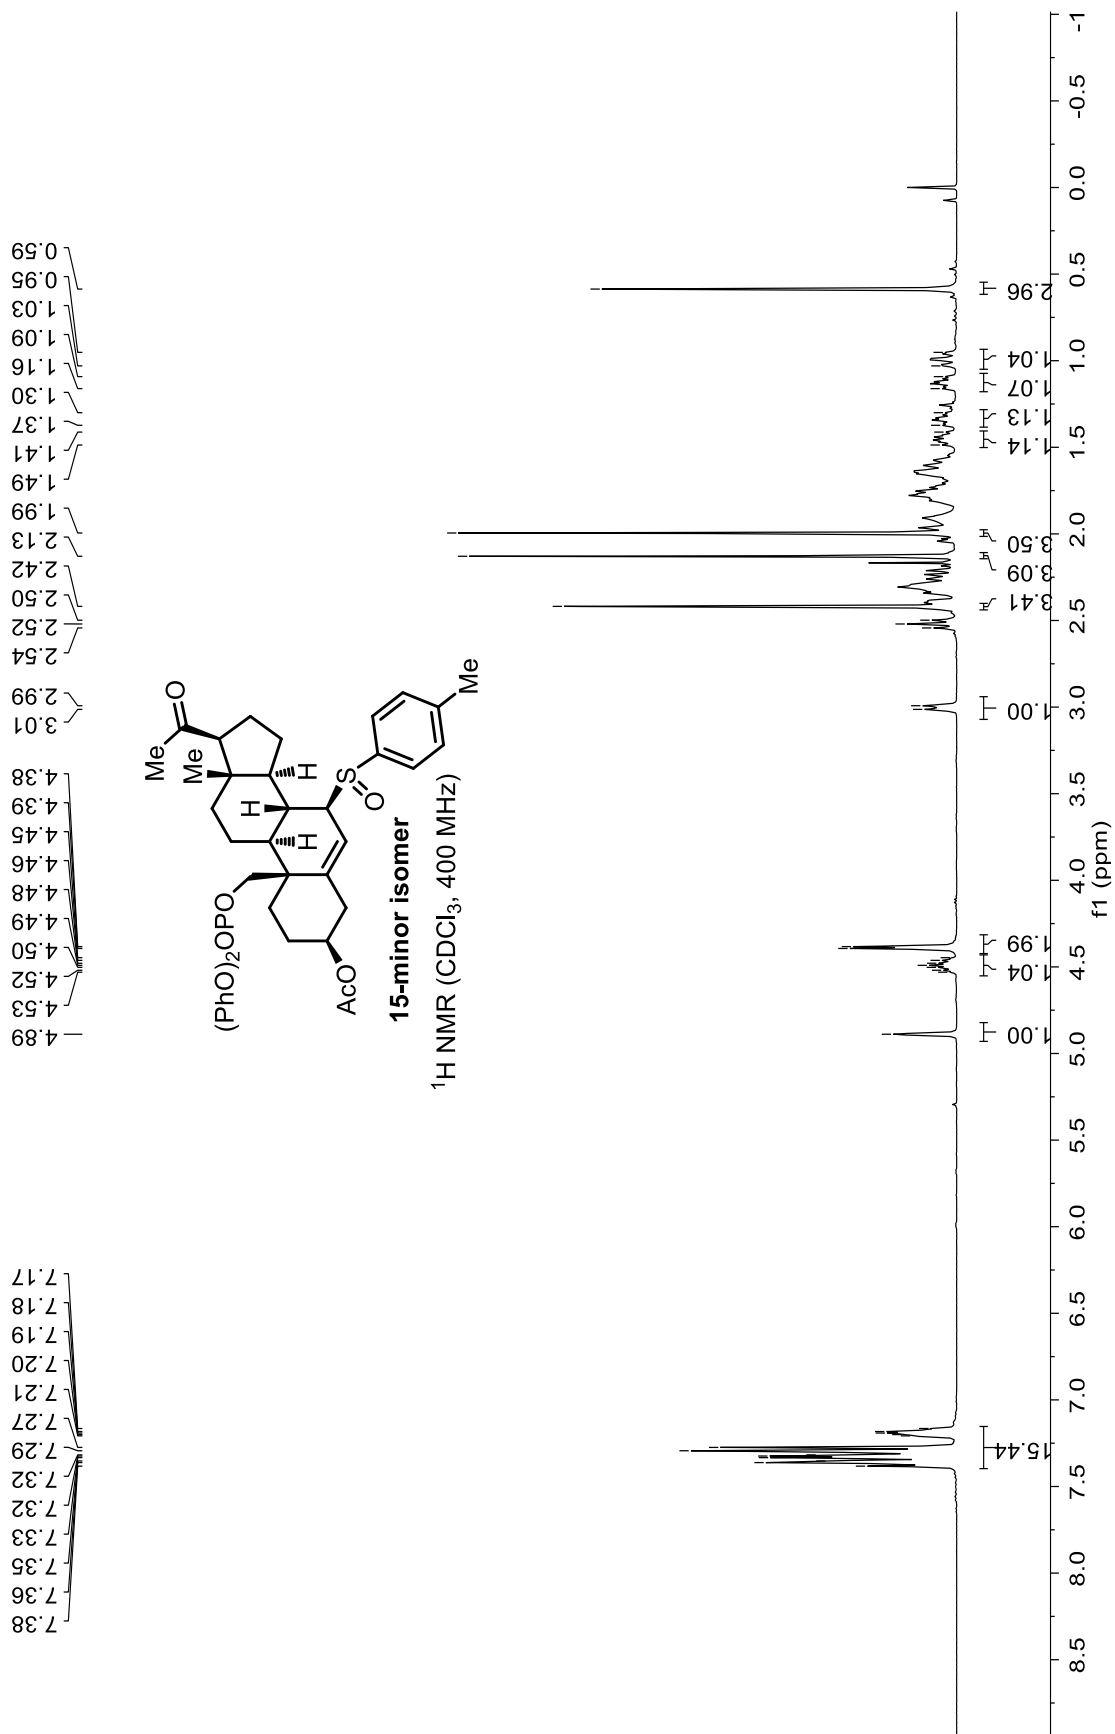

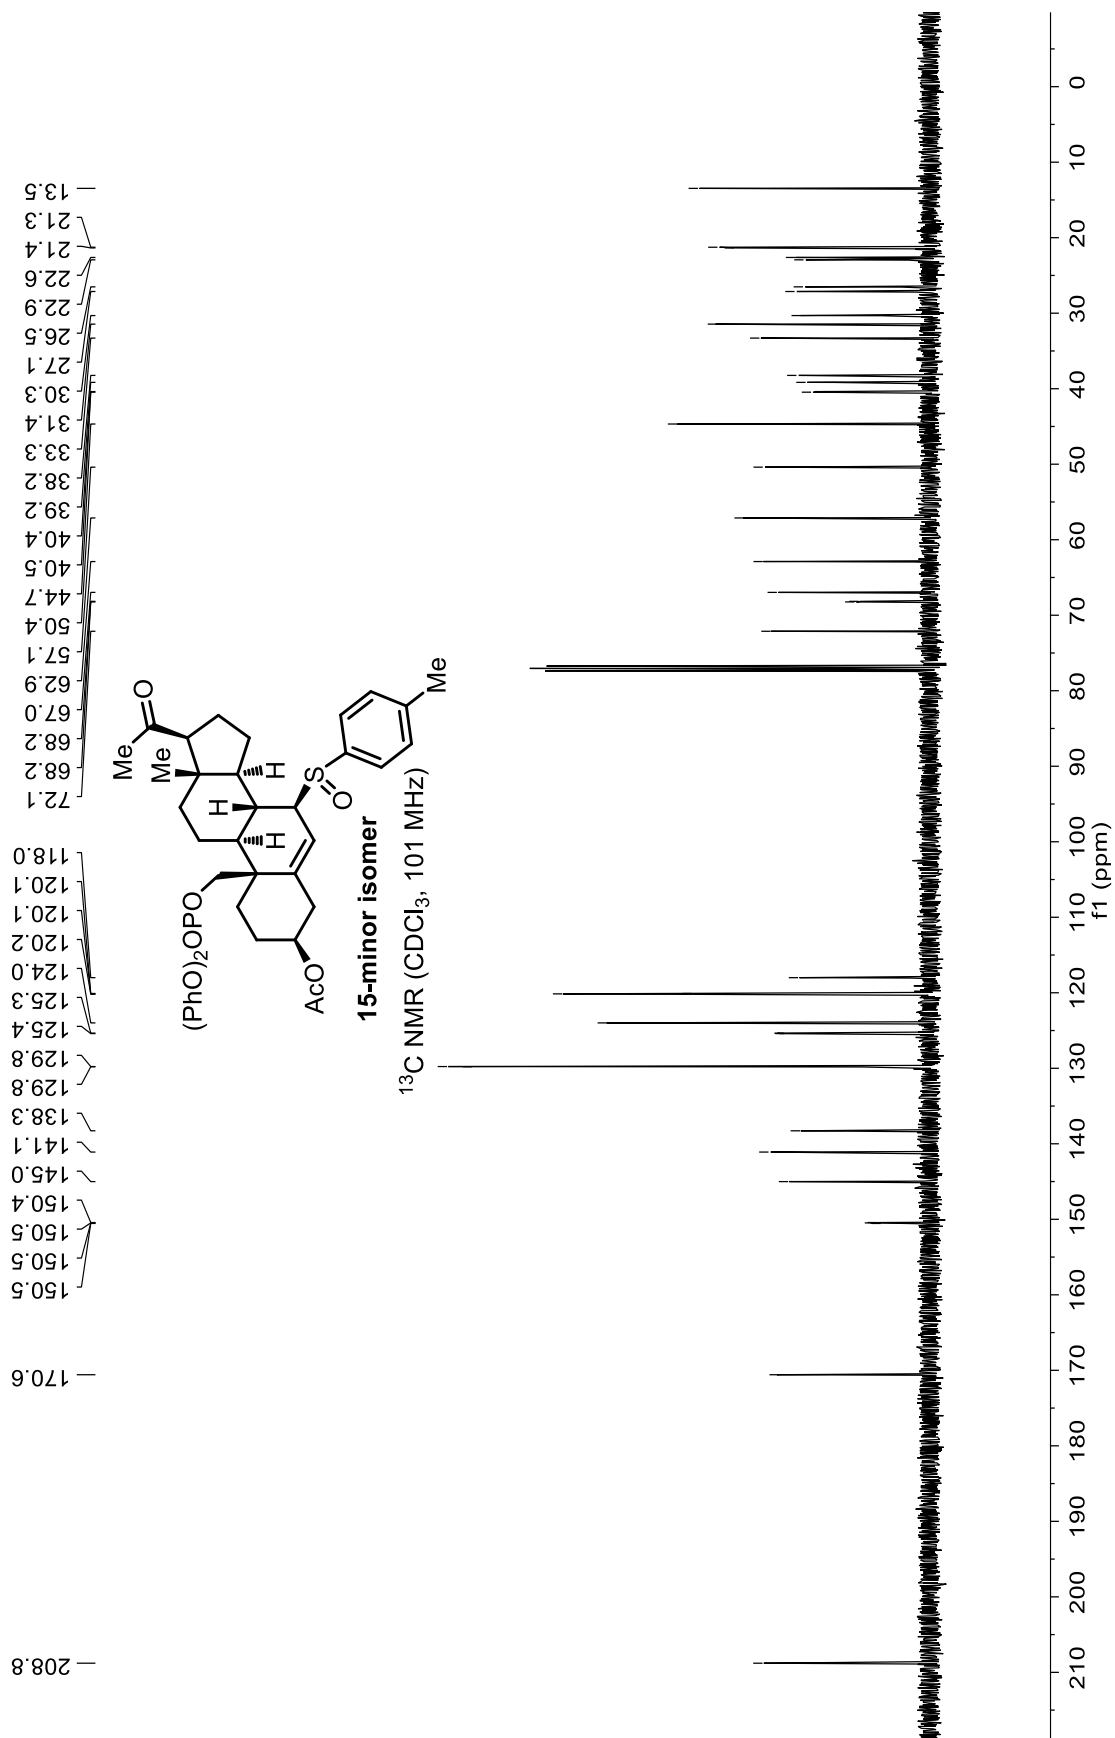

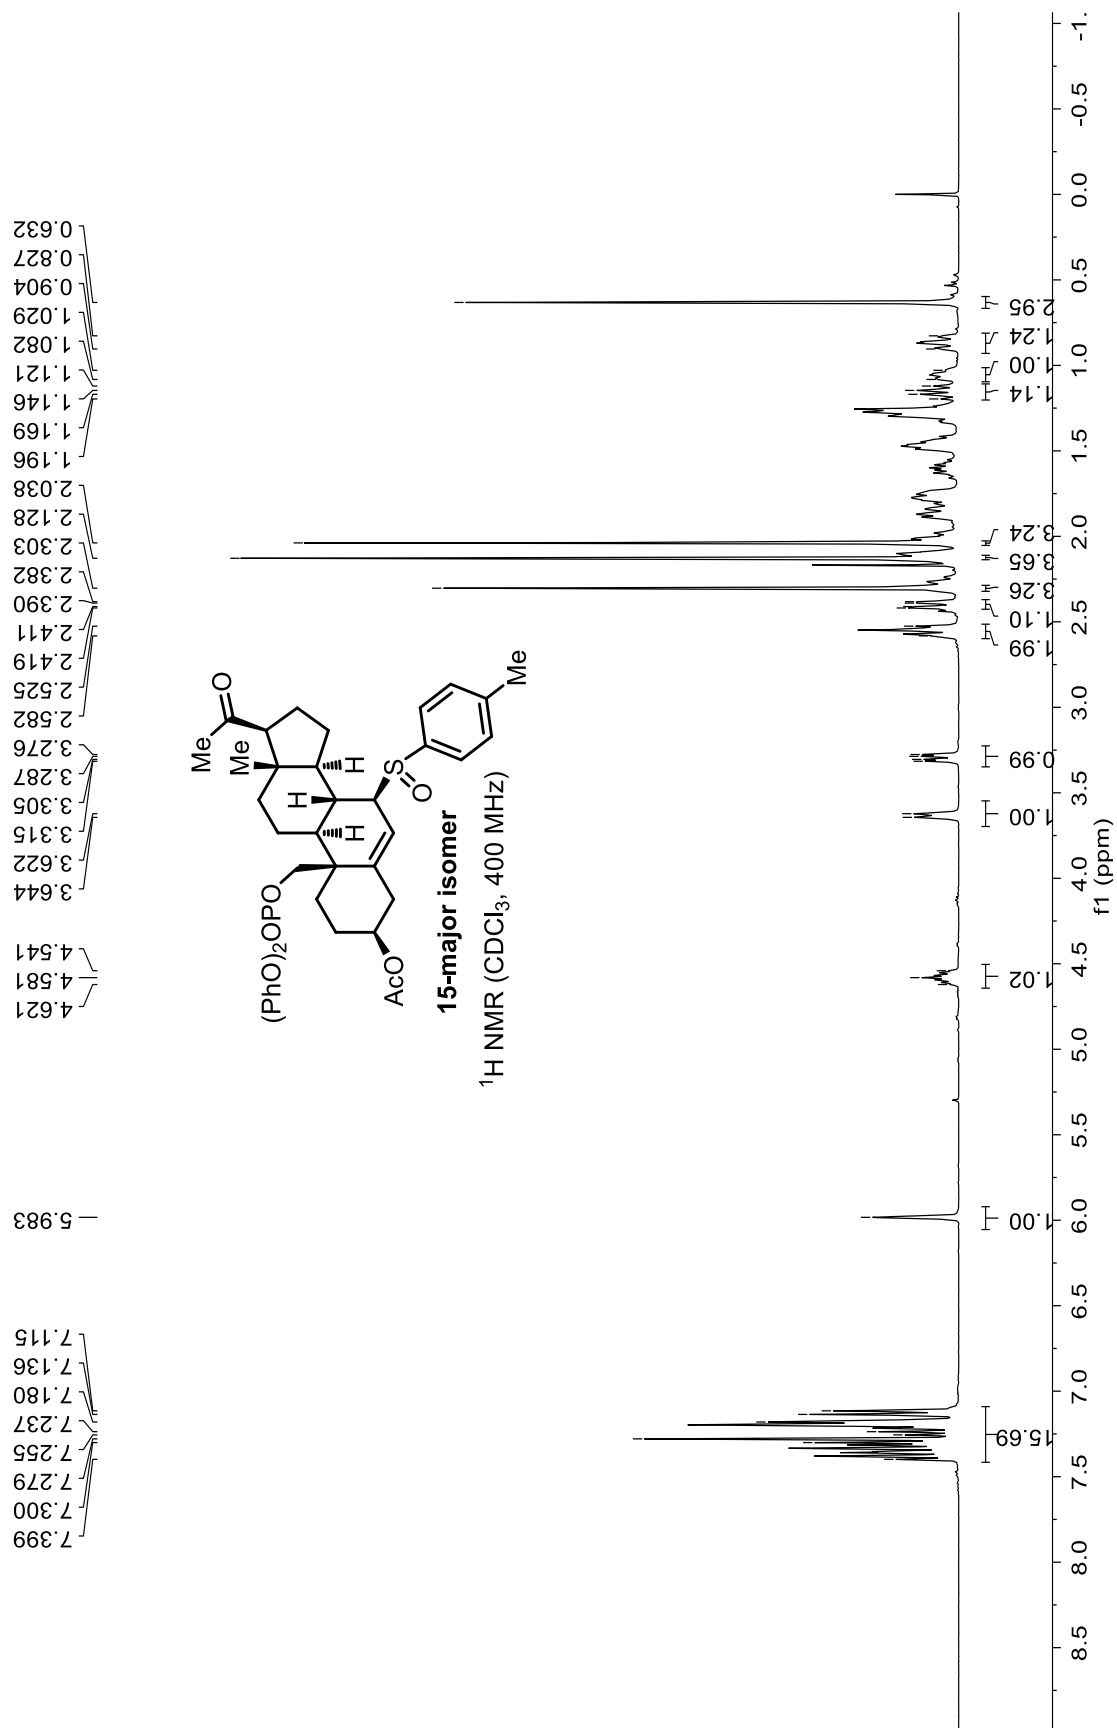

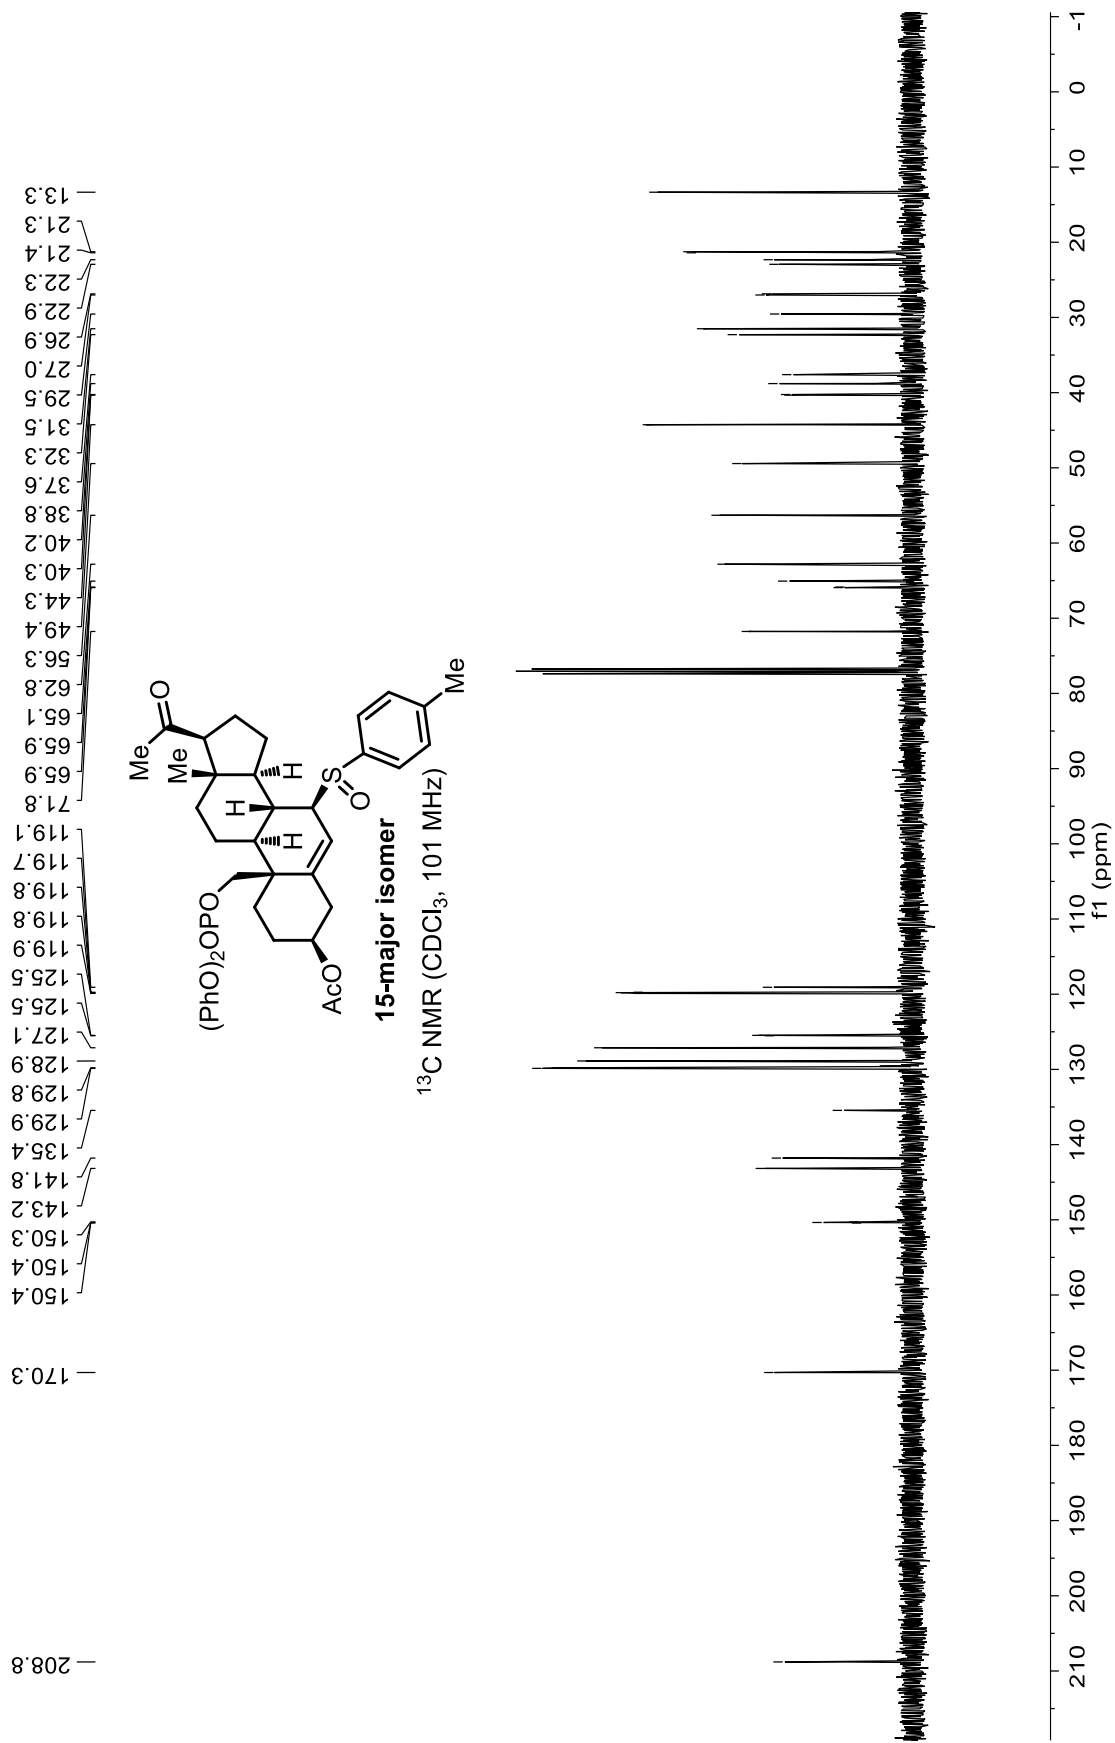

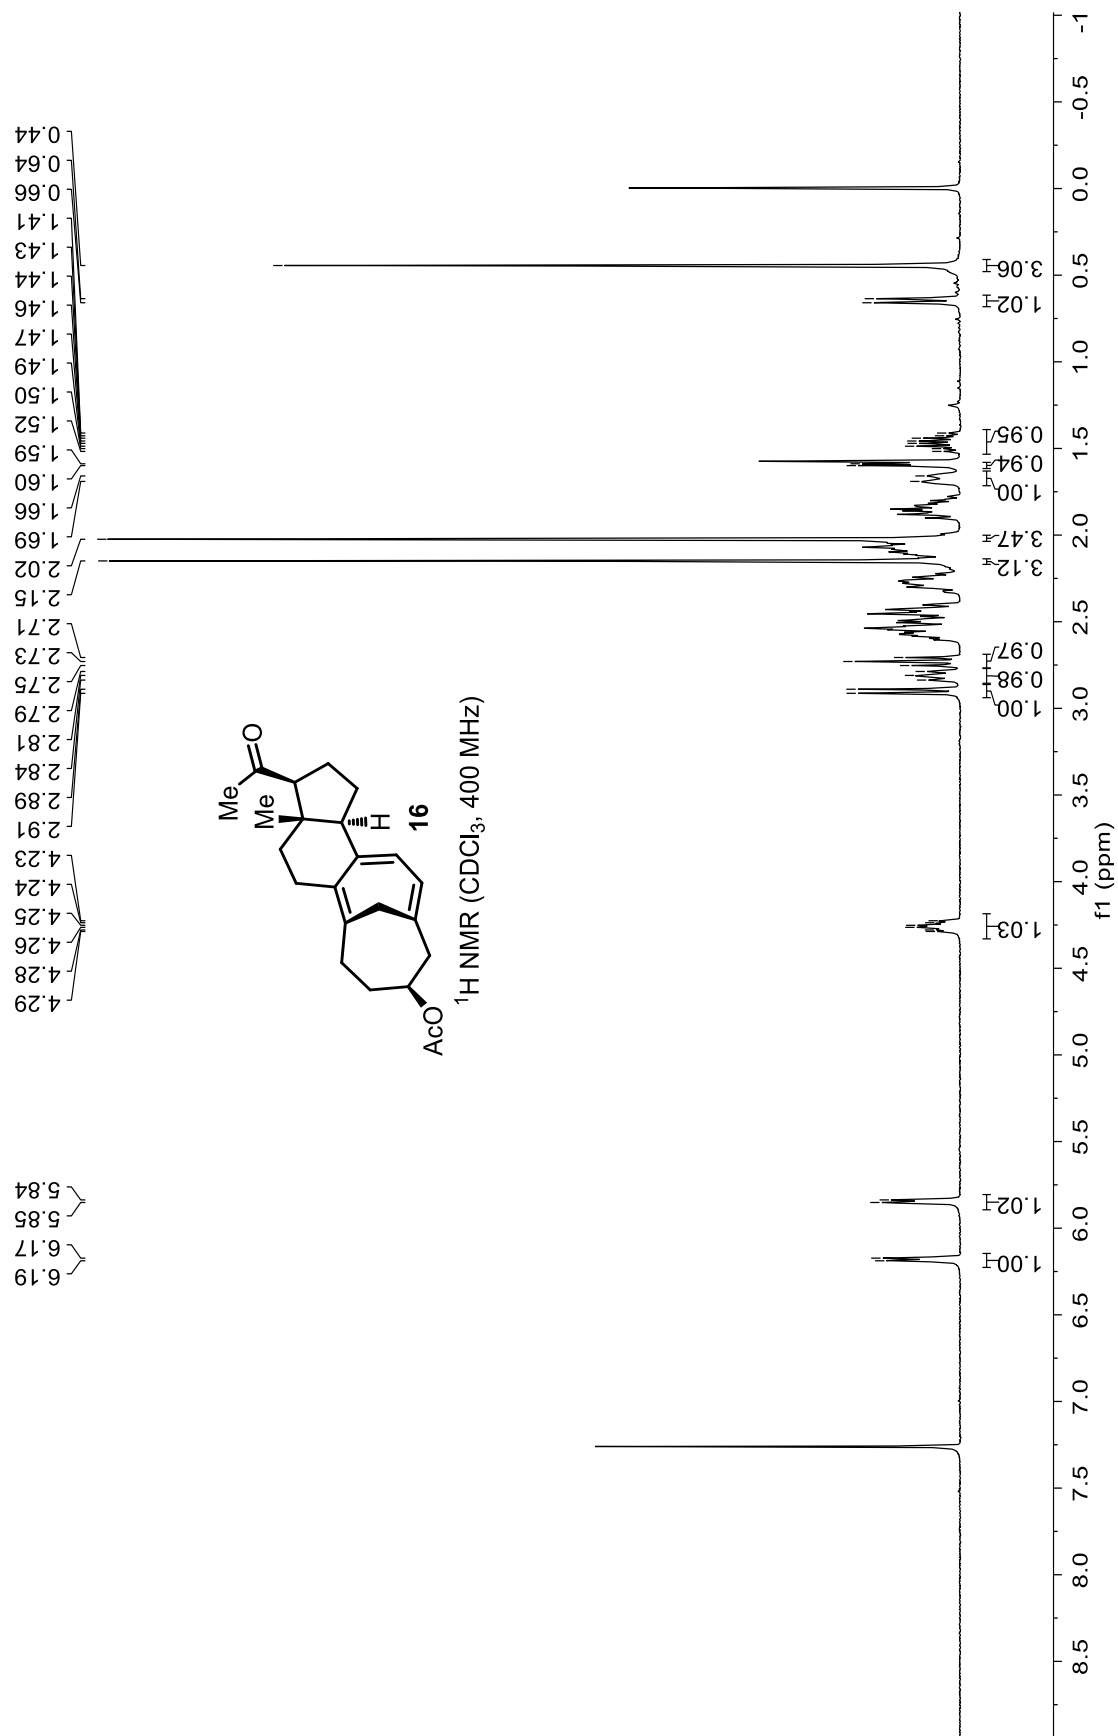

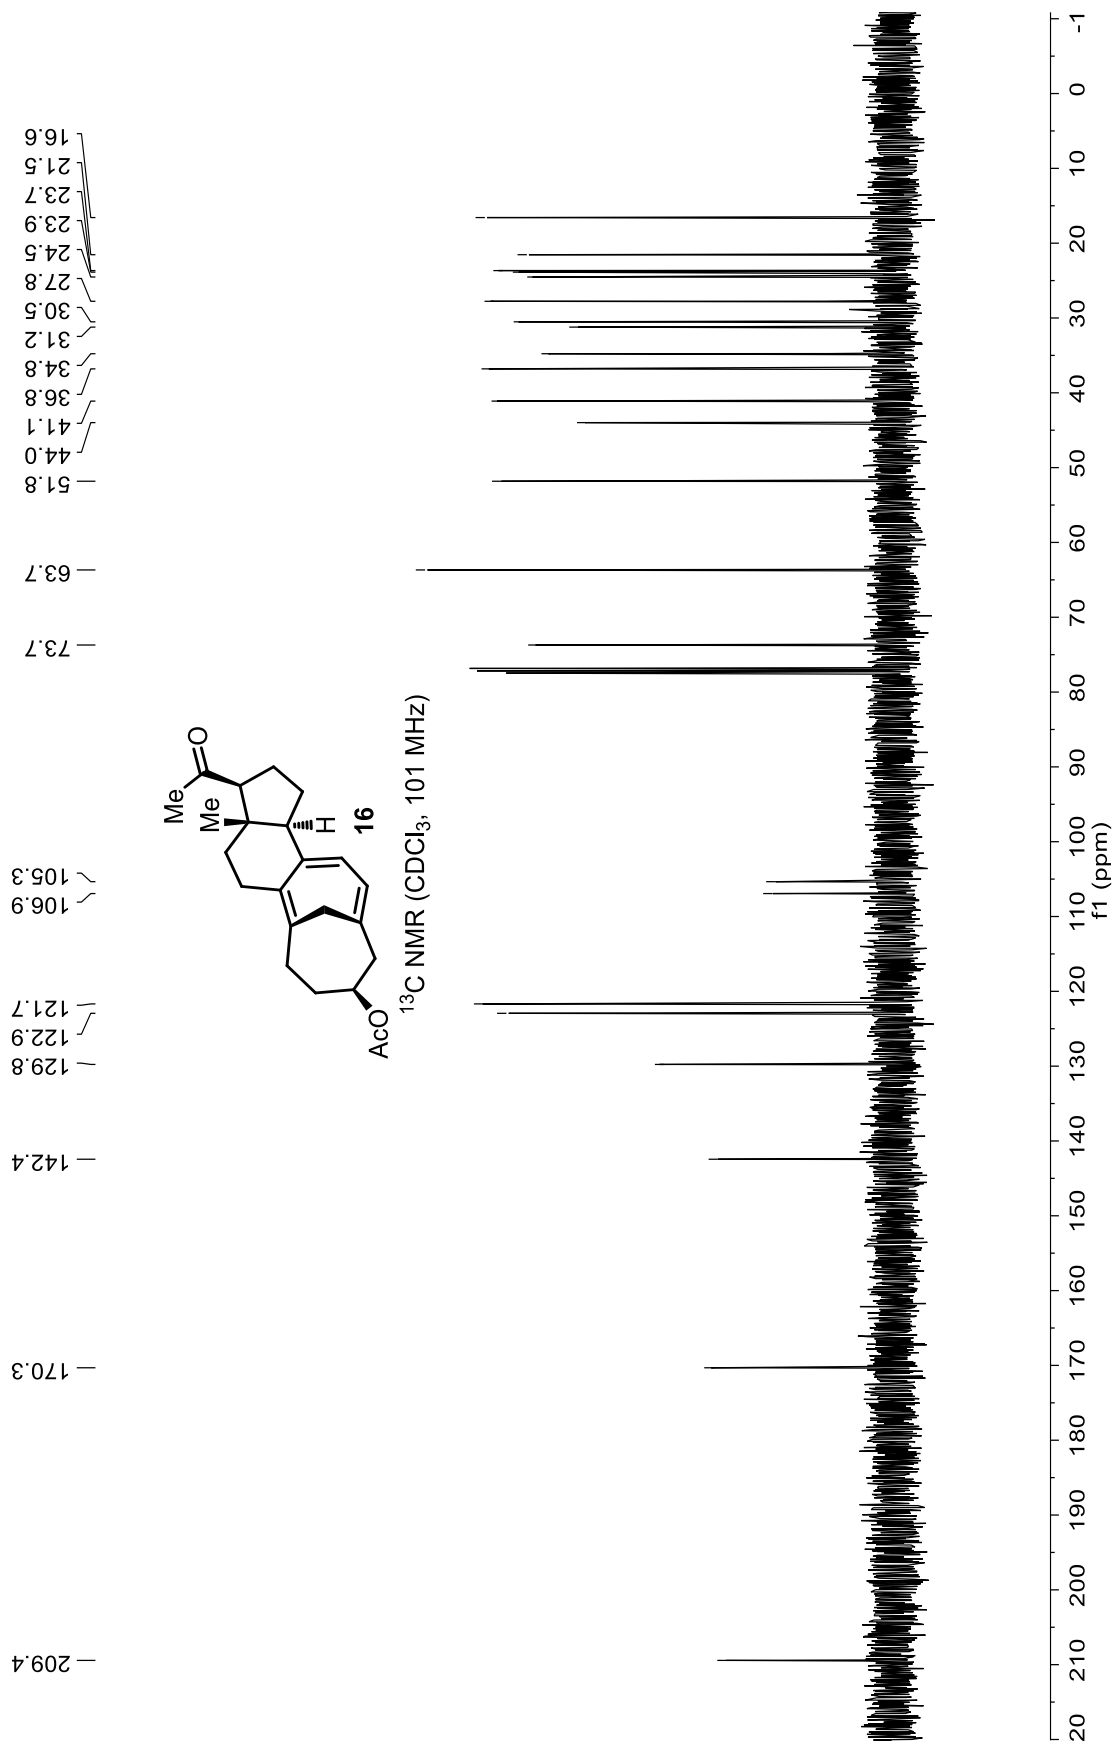

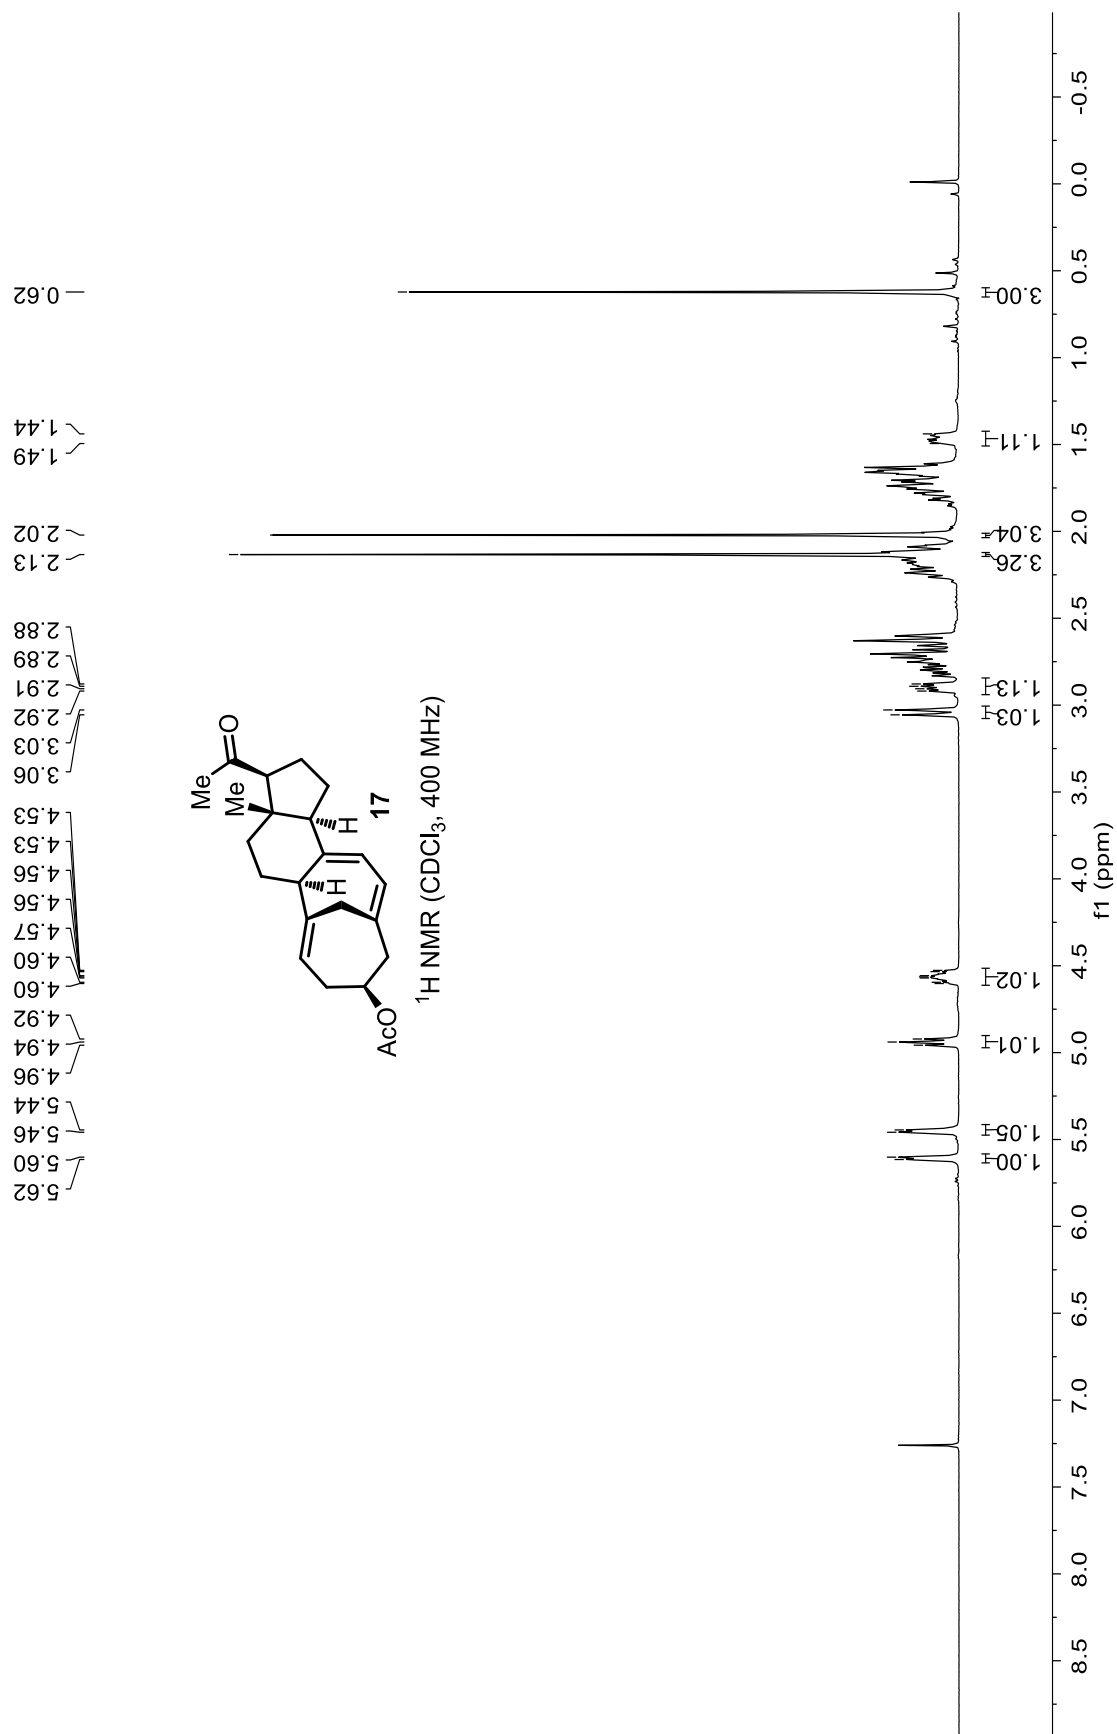

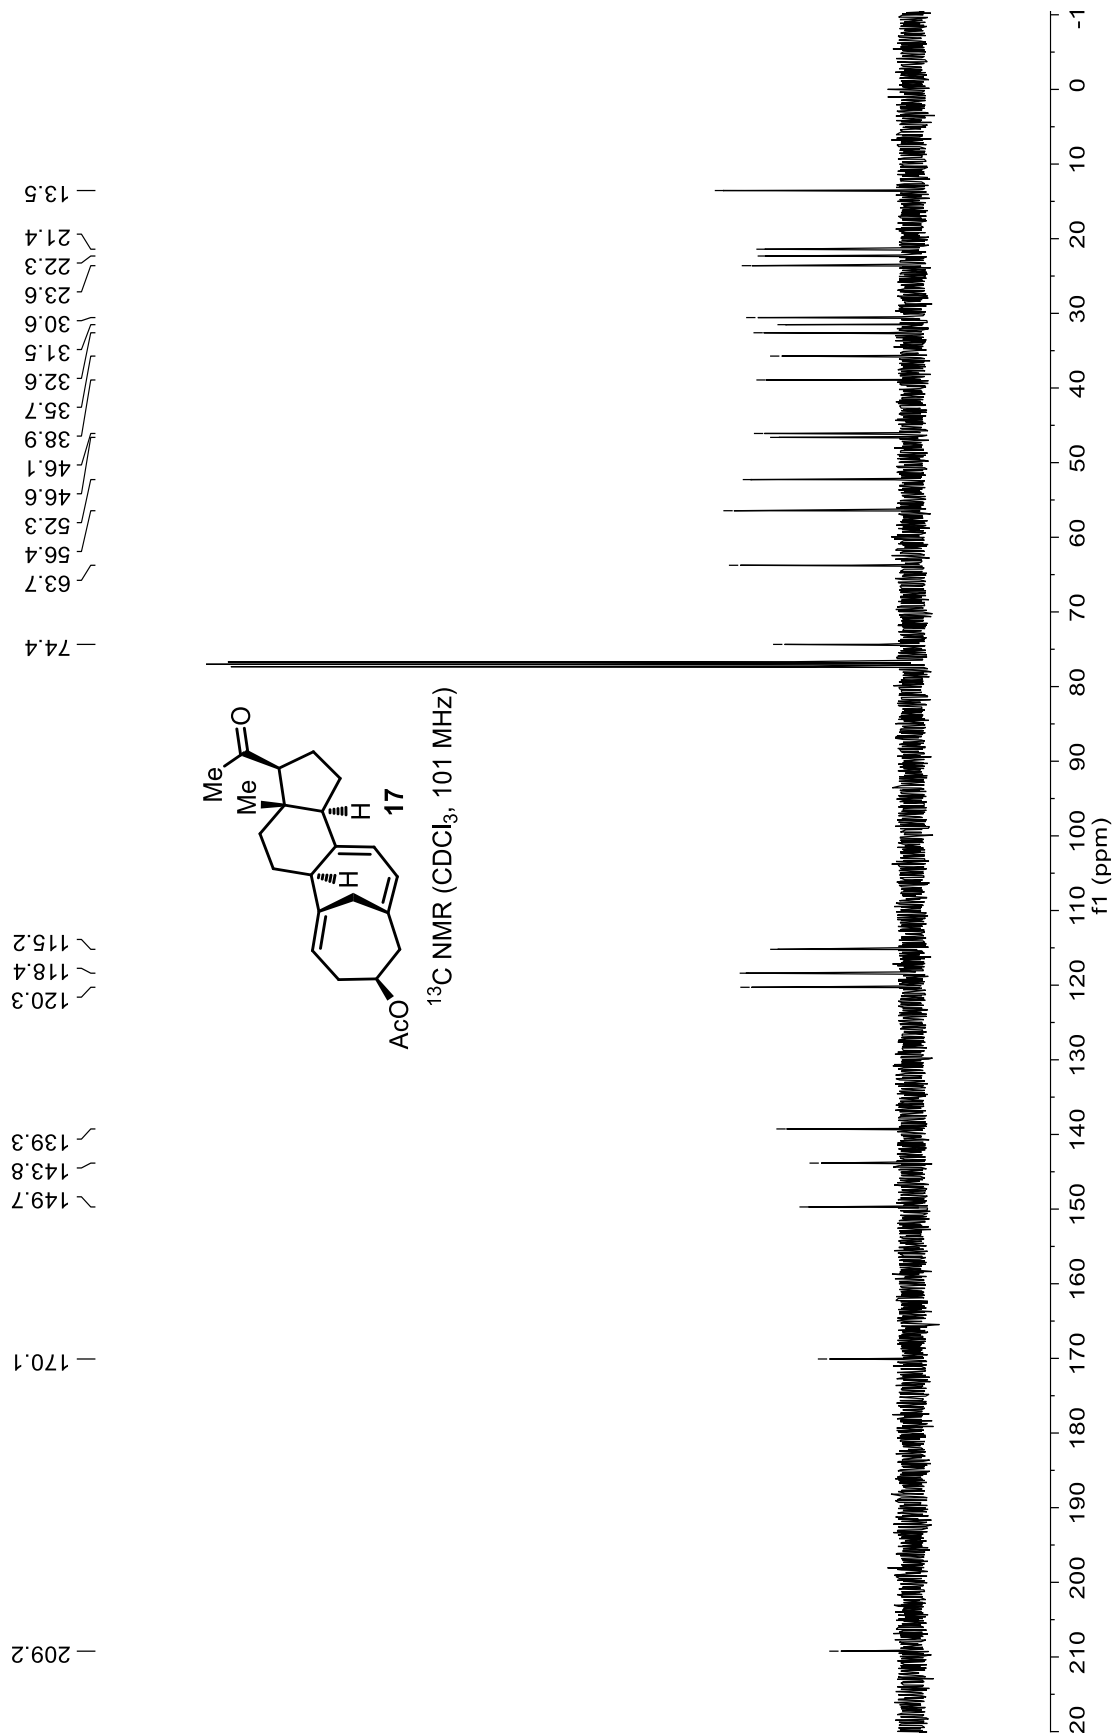

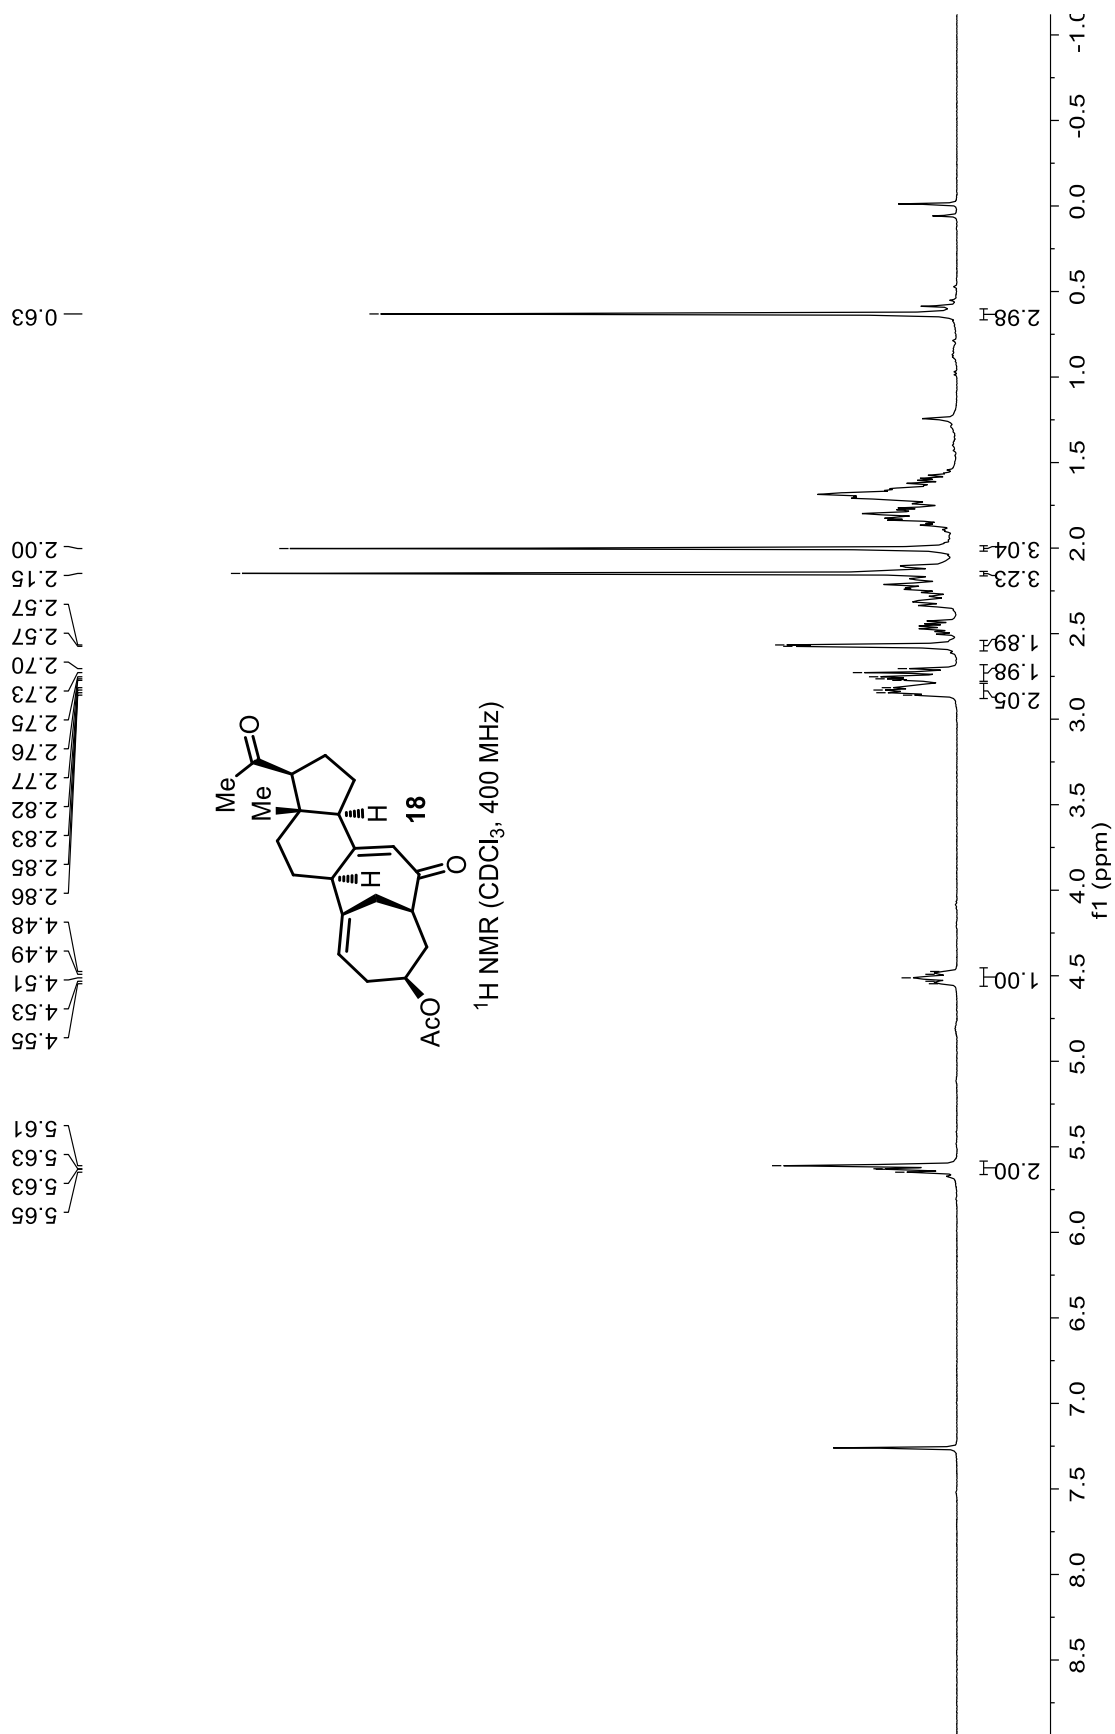

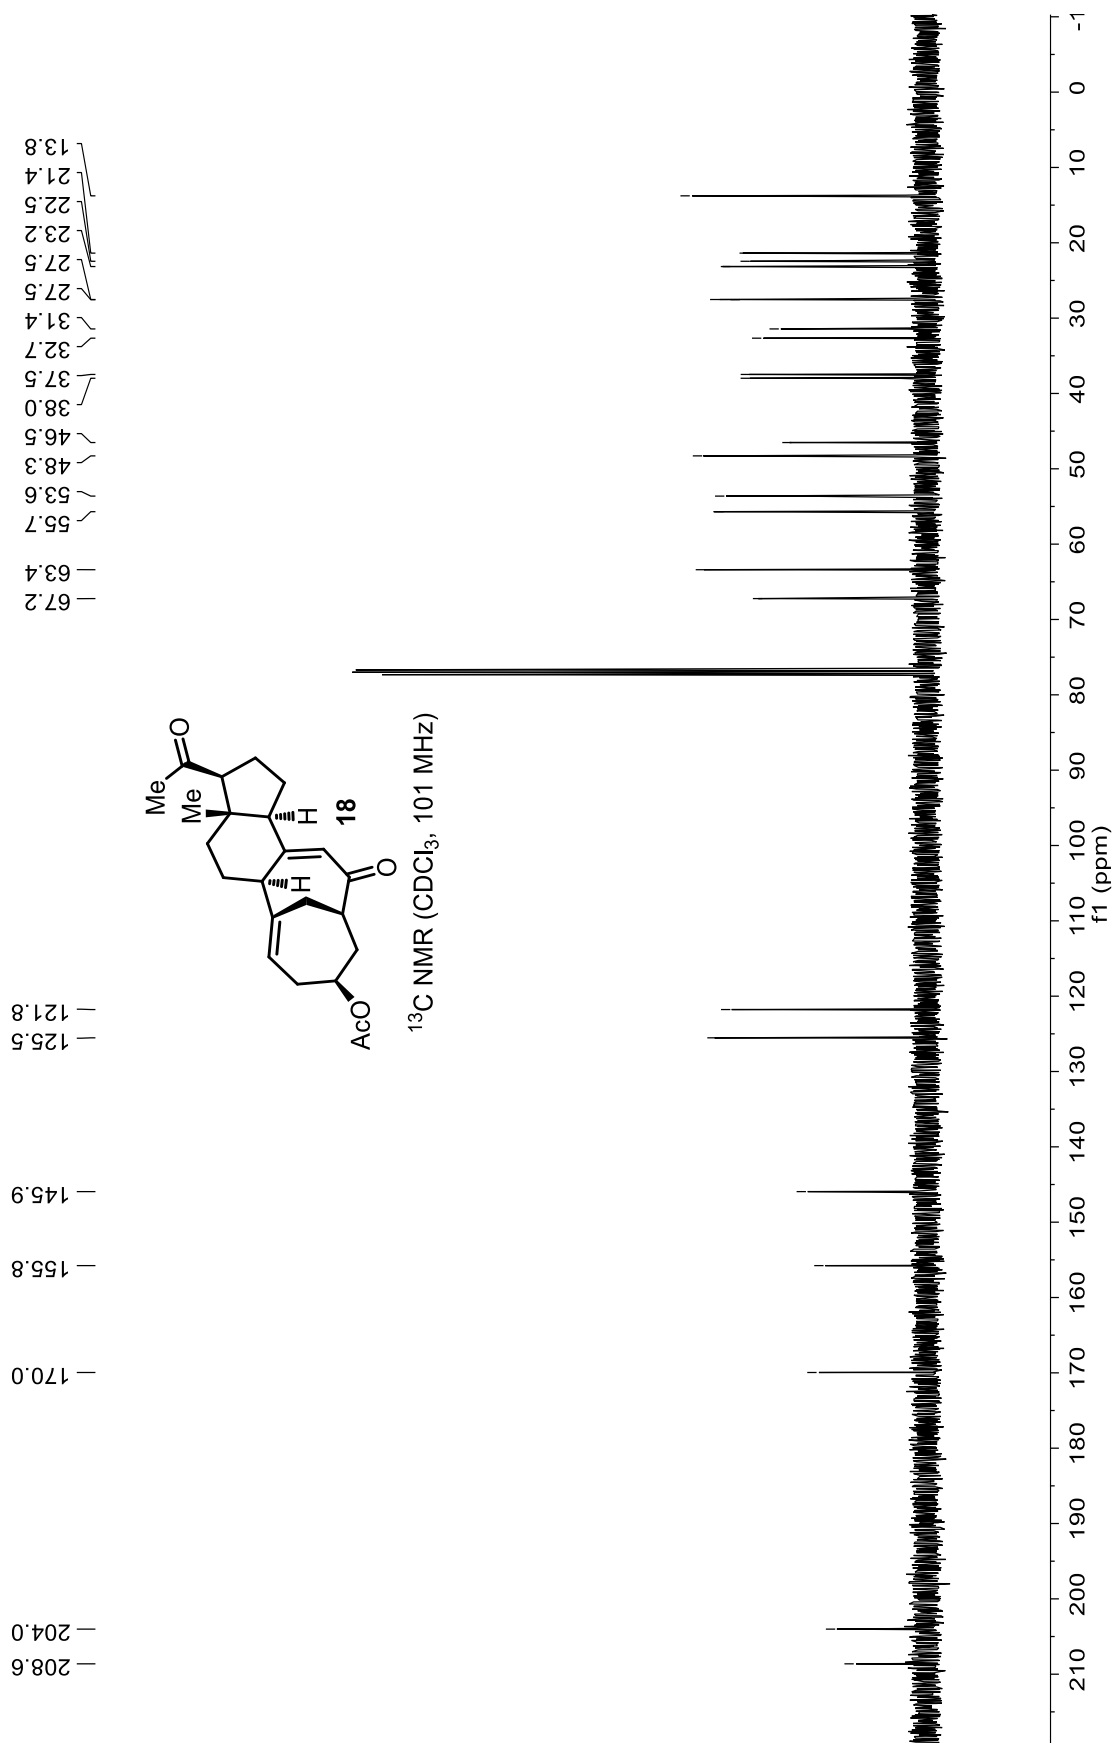

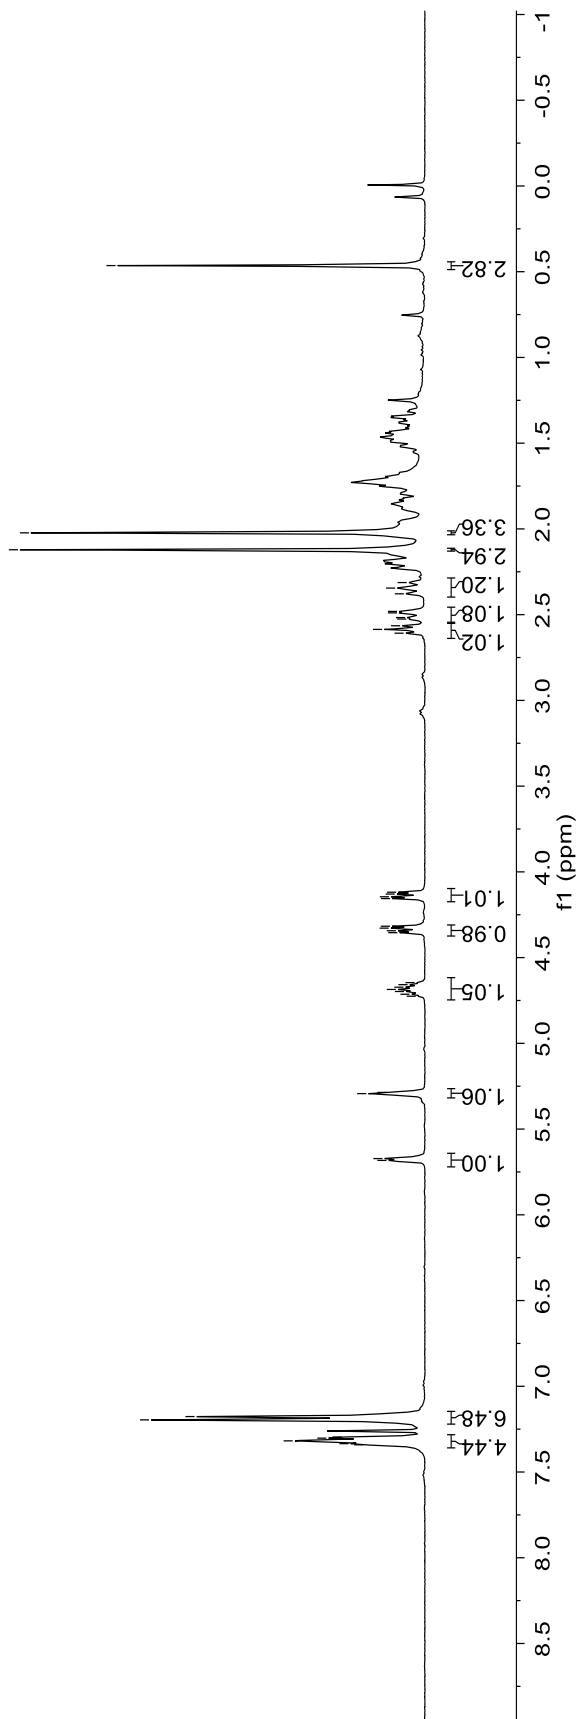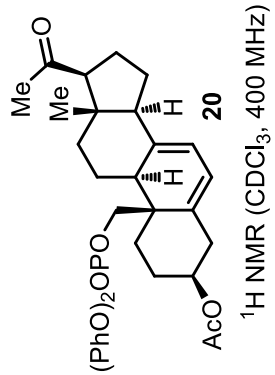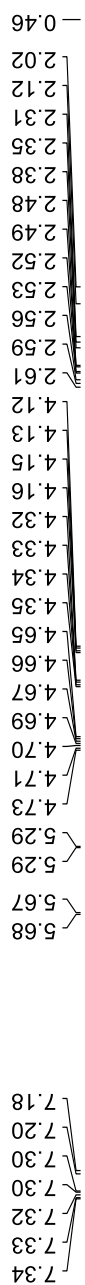

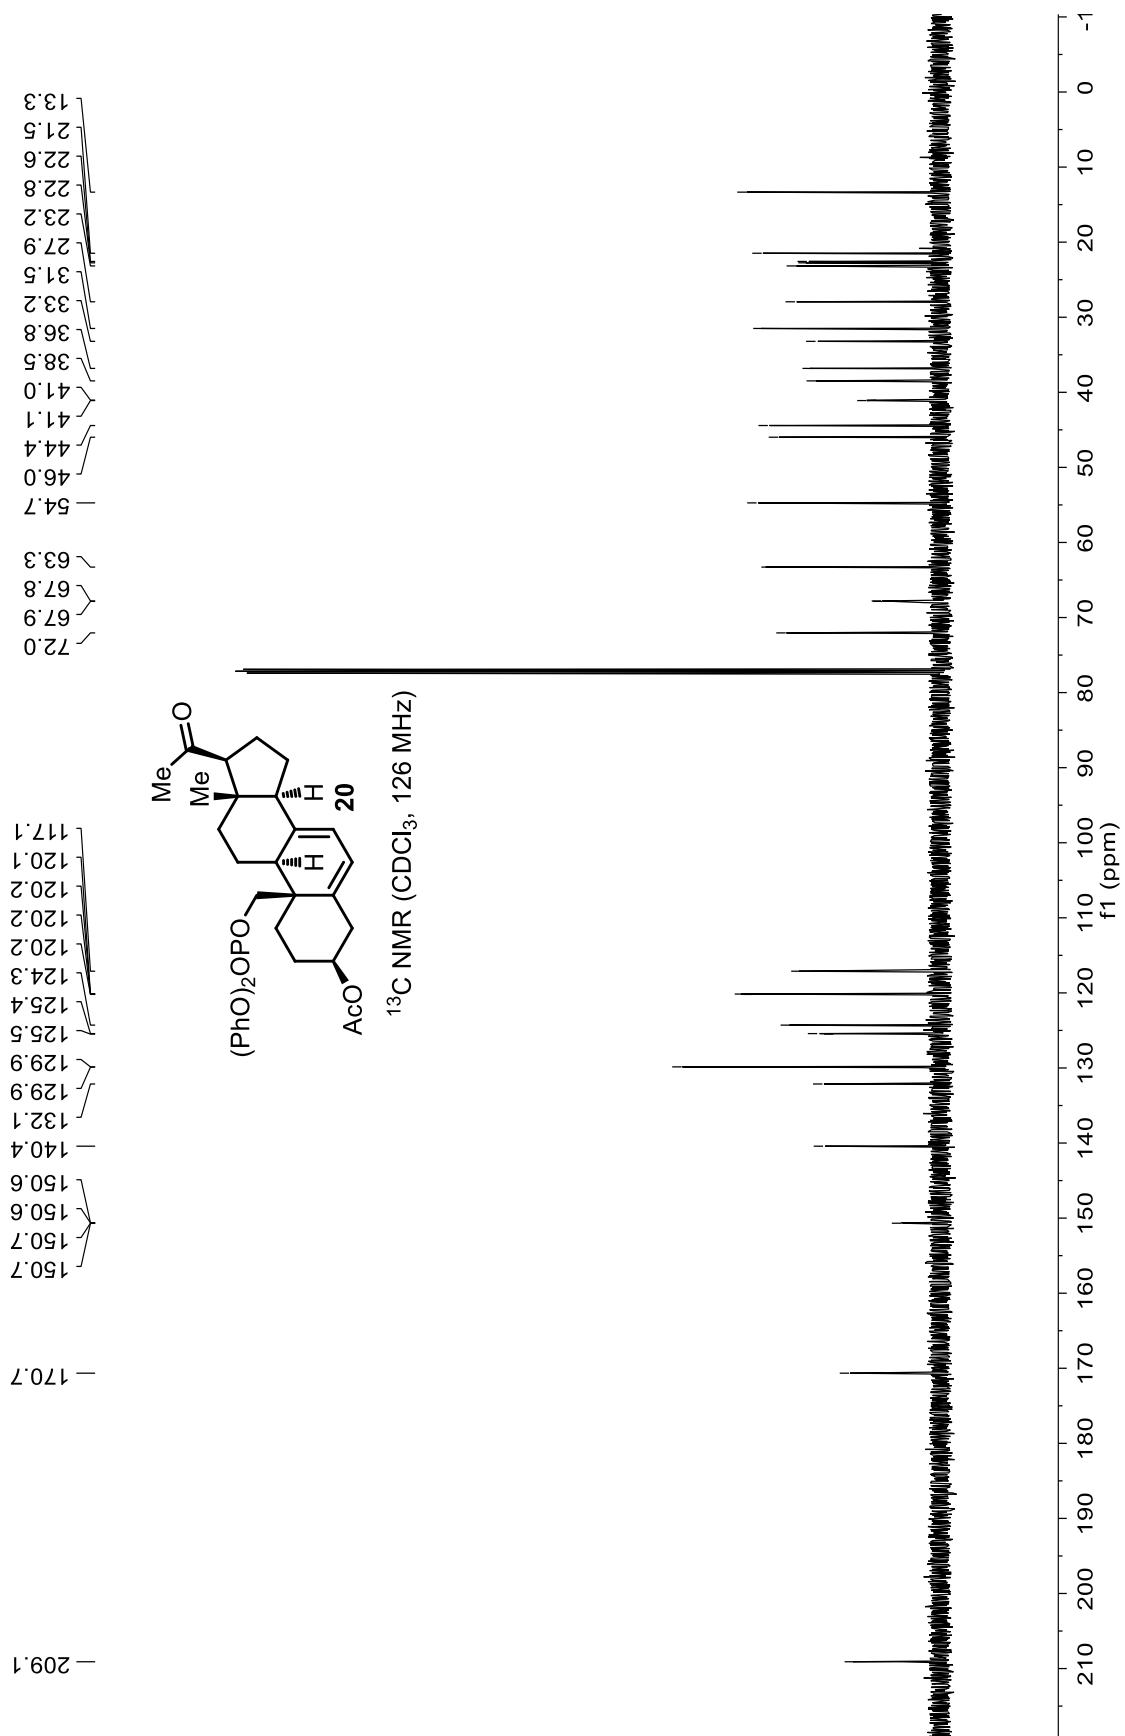

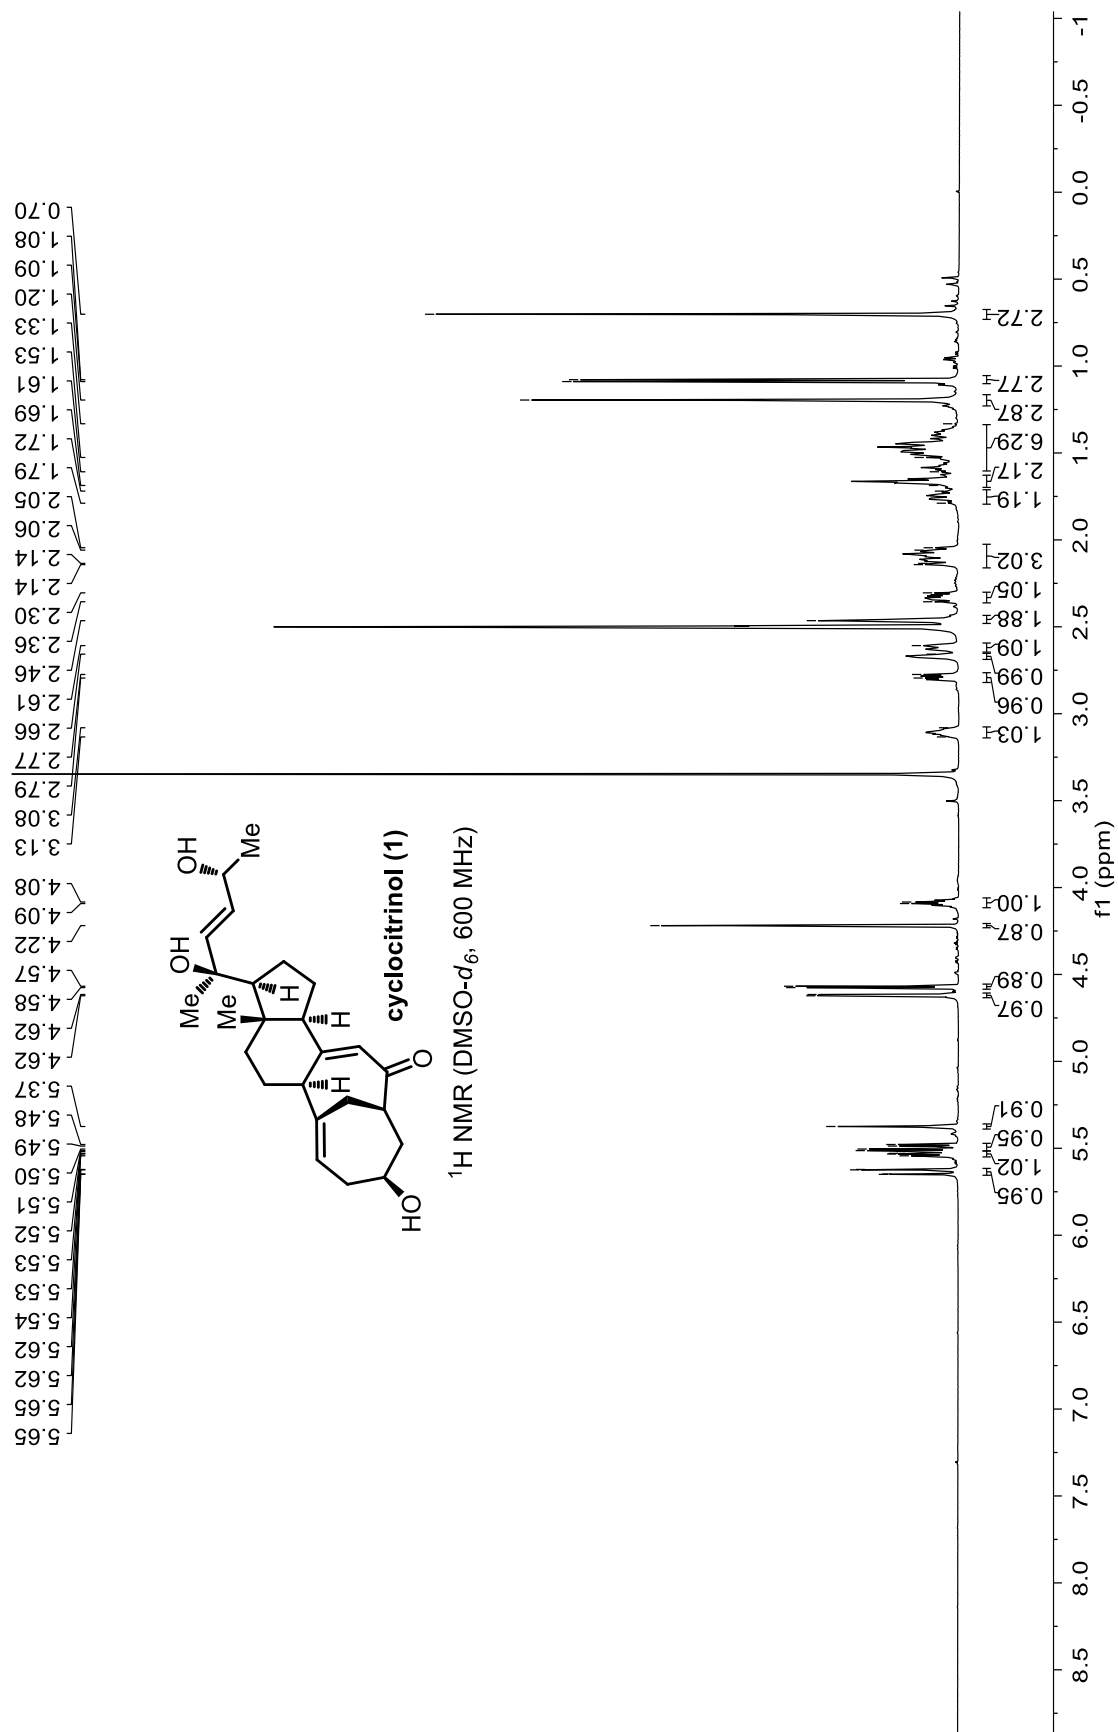

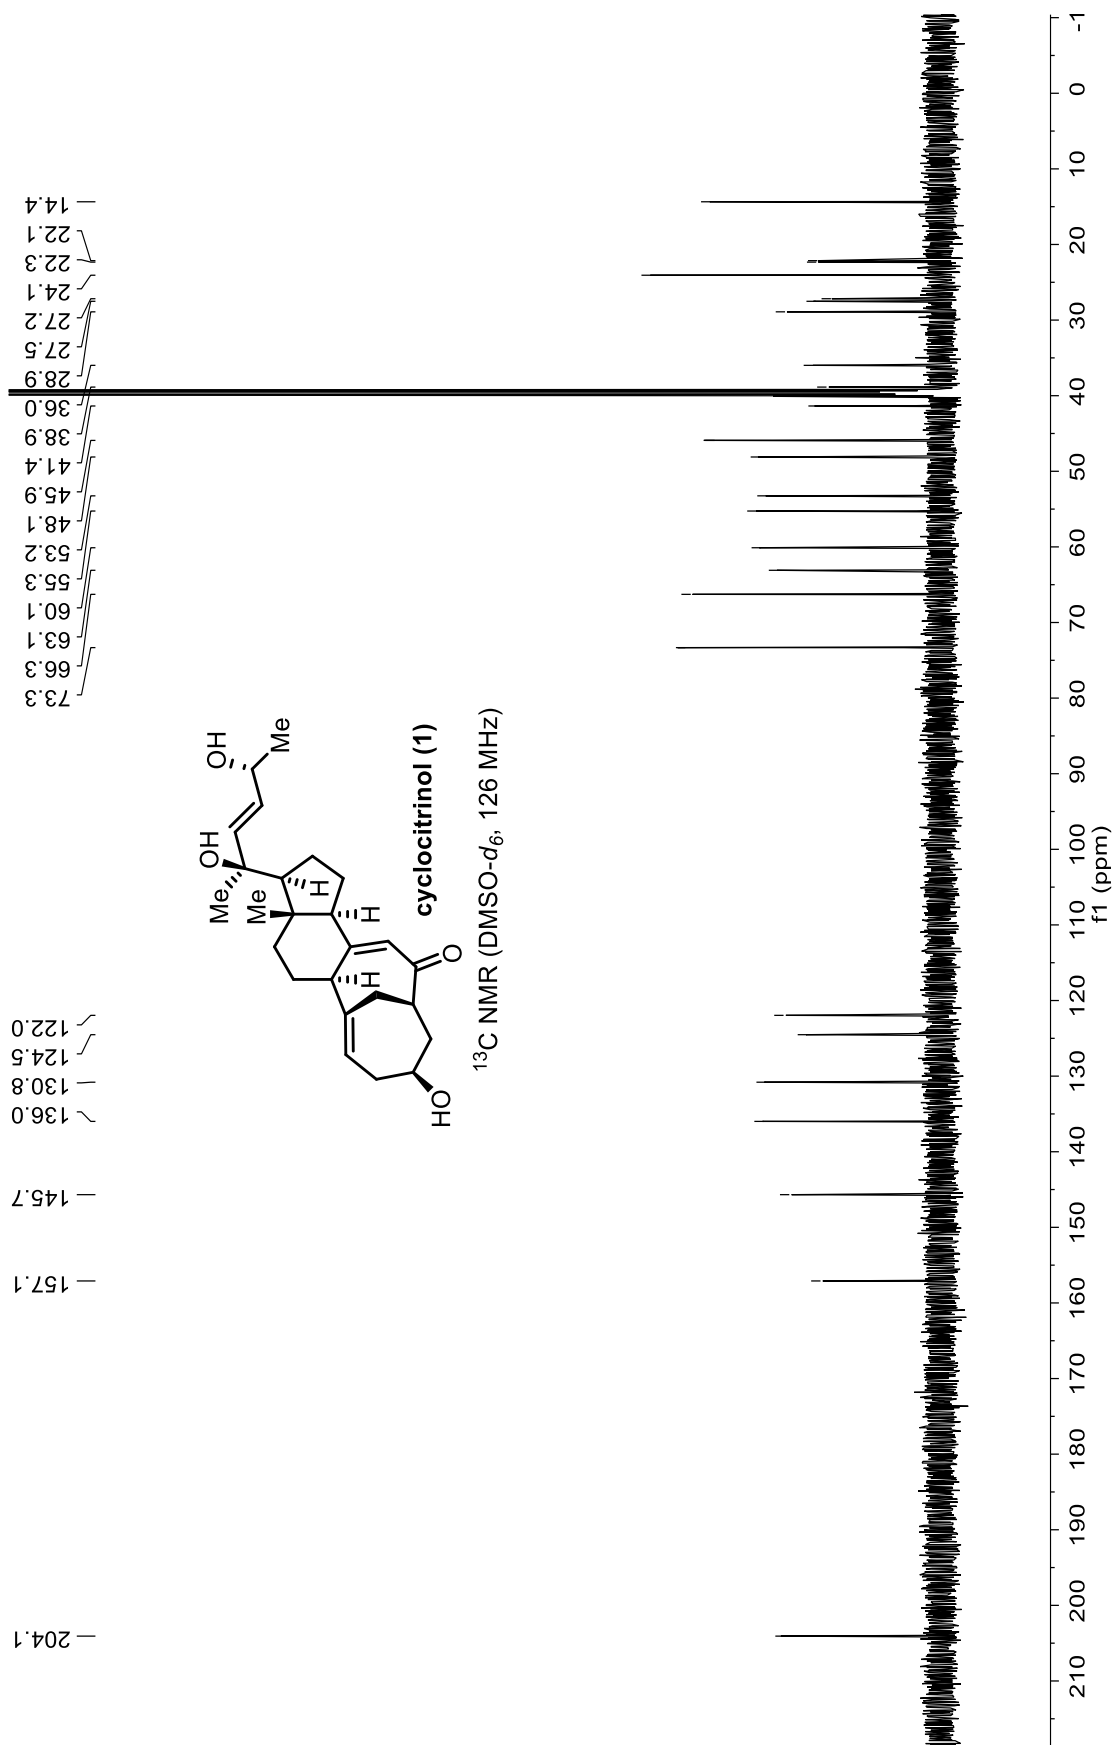

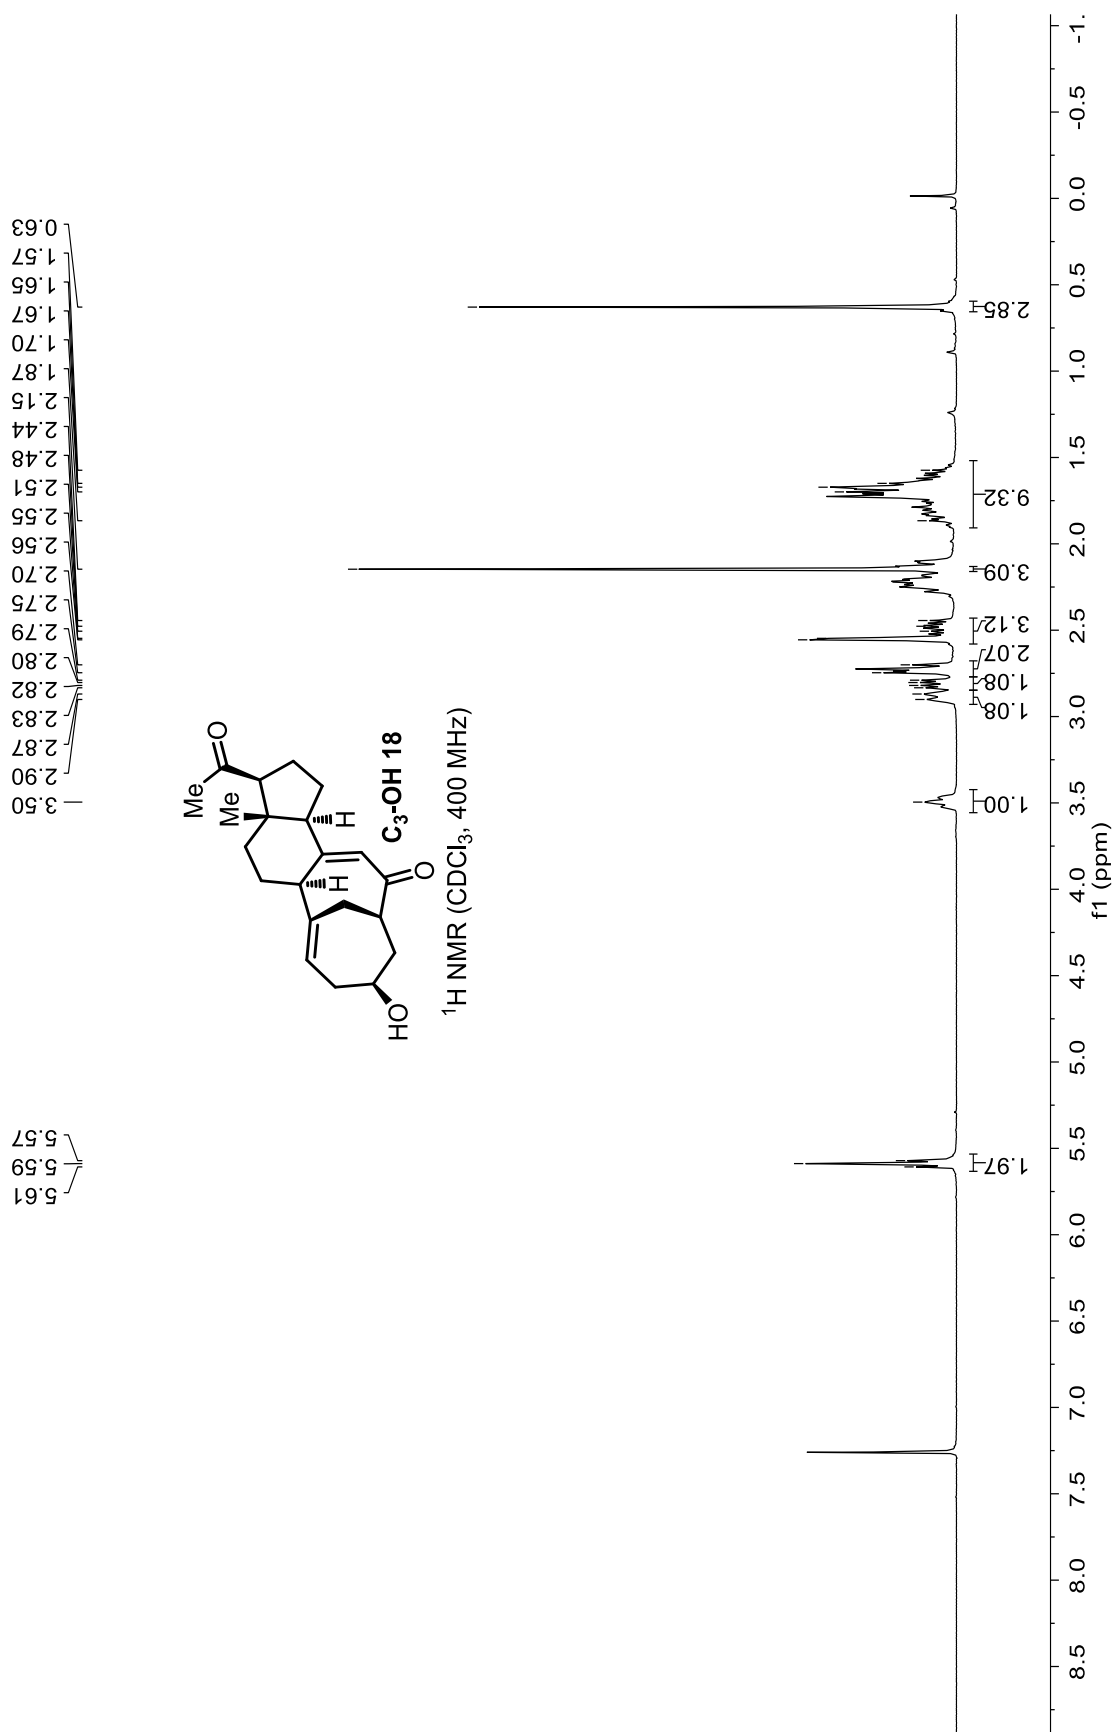

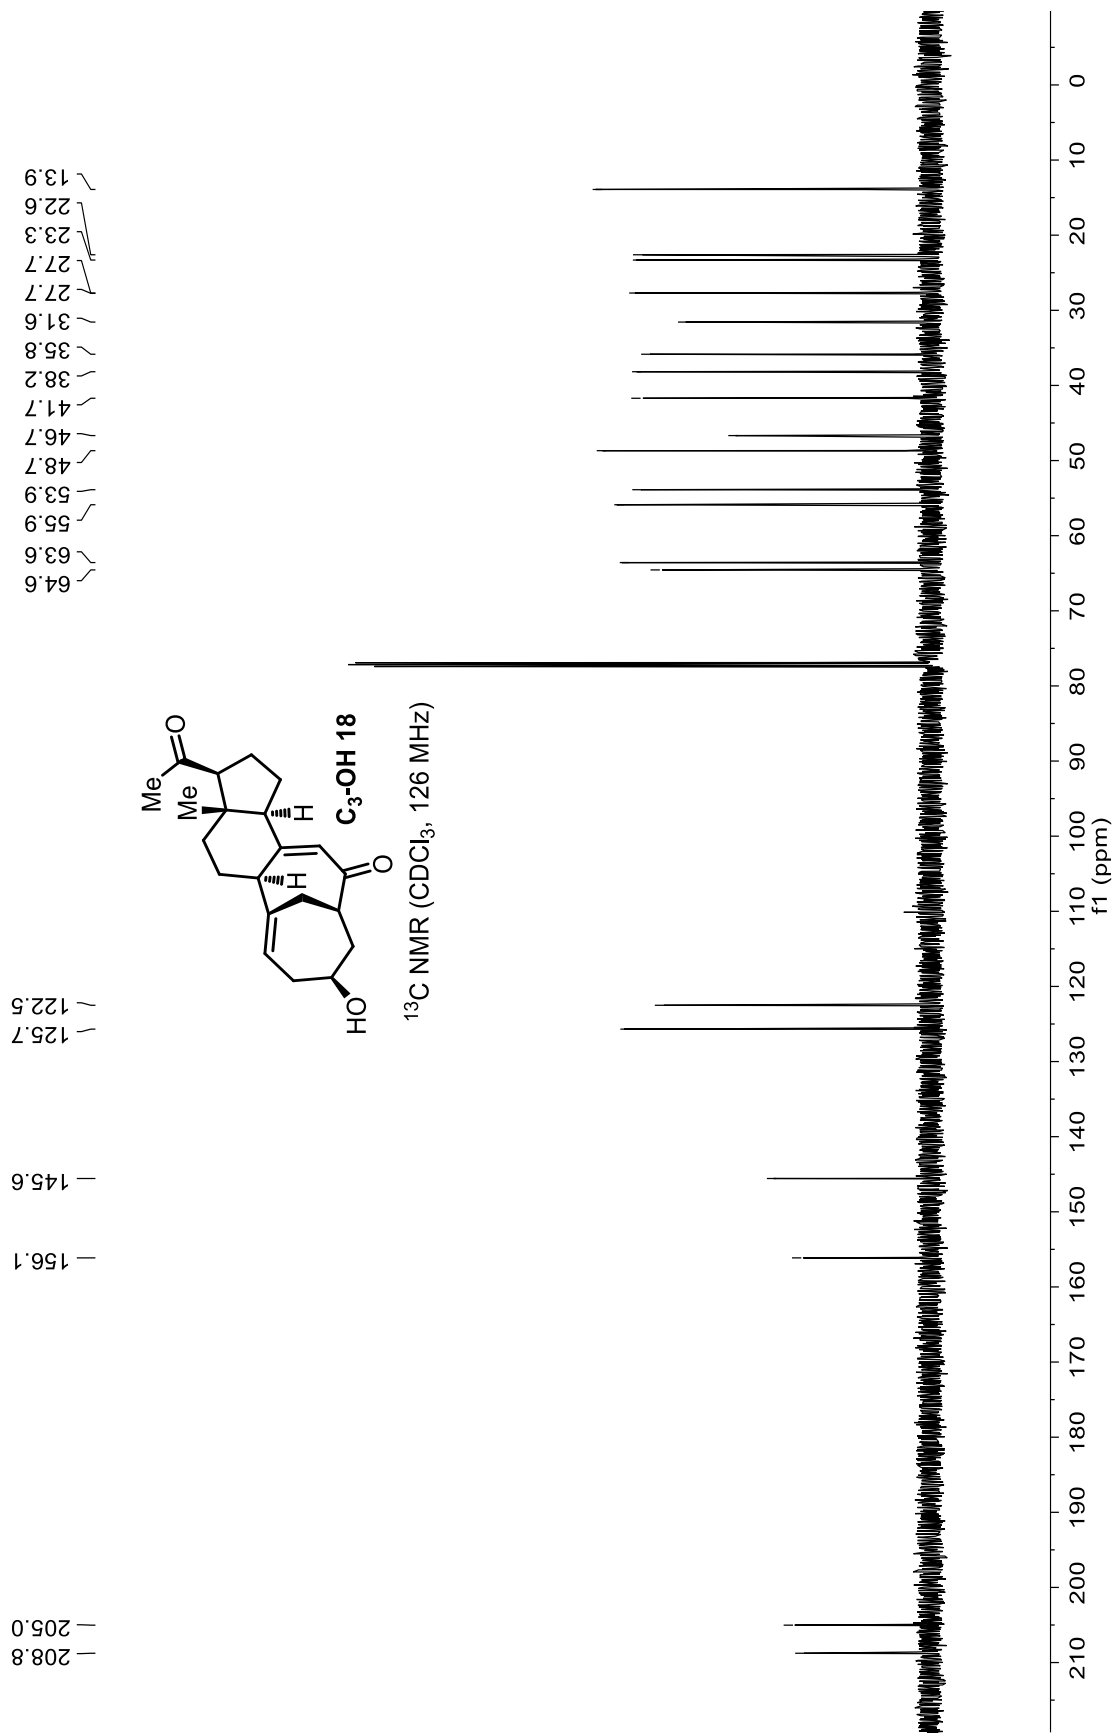

Supplement: Supplementary file 1 [file 12454367]
